# Supplementary material for: Method for the Identification of Plant DNA in Food Using Alignment-Free Analysis of Sequencing Reads: A Case Study on Lupin
Source: Front Plant Sci. 2020 May 21;11:646. doi: 10.3389/fpls.2020.00646 (PMC7253697; doi:10.3389/fpls.2020.00646)
Supplement: Supplementary file 3 [file Table_1.XLSX]

## Sheet: Supplementary_material_TableS1
Supplementary Table 1. The list of GenBank accession numbers and taxa names of 4,658 assembled chloroplast genome sequences used for creating the k-mer lists.
GenBank accession no.	Taxa and details about chloroplast genome sequence
KJ468099.1	Lupinus albus chloroplast, complete genome
MG252262.1	Lupinus westianus chloroplast, complete genome
KC695666.1	Lupinus luteus chloroplast, complete genome
KT428296.1	Inga leiocalycina chloroplast, complete genome
KX641589.1	Populus lasiocarpa chloroplast, complete genome
KY636027.1	Aegilops longissima voucher AE 1078 chloroplast, partial genome
KU182862.1	UNVERIFIED: Isatis tinctoria chloroplast sequence
JF412791.1	Cucumis melo subsp. melo chloroplast, complete genome
HM173080.1	Selaginella moellendorffii chloroplast, complete genome
FJ899563.2	Pinus torreyana subsp. insularis chloroplast, partial genome
FJ899579.1	Pinus merkusii chloroplast, partial genome
FJ899574.1	Pinus cembra chloroplast, partial genome
FJ899573.1	Cedrus deodara chloroplast, partial genome
FJ899569.1	Pinus attenuata chloroplast, partial genome
FJ899568.1	Pinus armandii chloroplast, partial genome
FJ899560.1	Pinus strobus chloroplast, partial genome
FJ899558.1	Pinus sibirica chloroplast, partial genome
AY228468.2	Pinus koraiensis chloroplast, complete genome
KJ468102.1	Robinia pseudoacacia chloroplast, complete genome
KJ468098.1	Indigofera tinctoria chloroplast, complete genome
KJ468095.1	Libidibia coriaria chloroplast, complete genome
KJ468094.1	Arachis hypogaea chloroplast, complete genome
KR336549.1	Ananas comosus cultivar MD-2 chloroplast, complete genome
KM103383.1	Lilium sp. KHK-2014 chloroplast, complete genome
KF856618.1	Apios americana chloroplast, complete genome
KF696682.1	Trithuria filamentosa chloroplast, partial genome
KF176554.1	Berberis bealei chloroplast, complete genome
HE963749.1	Trithuria inconspicua complete chloroplast genome
AP009339.1	Cycas taitungensis chloroplast DNA, complete genome
AB086179.1	Anthoceros formosae chloroplast DNA, complete genome
MF593126.1	Genlisea violacea chloroplast, complete genome
MF593125.1	Genlisea tuberosa chloroplast
MF593124.1	Genlisea repens chloroplast, complete genome
MF593123.1	Genlisea pygmaea chloroplast, complete genome
MF593122.1	Genlisea filiformis chloroplast, complete genome
MF593121.1	Genlisea aurea chloroplast, complete genome
JX280397.1	Magnolia liliiflora chloroplast, complete genome
KY702721.1	Aneura pinguis voucher ApinguisCpA chloroplast, complete genome
KY702720.1	Aneura pinguis voucher ApinguisCpE chloroplast, complete genome
KY636087.1	Dasypyrum villosum voucher PI 368884 chloroplast, partial genome
KY636083.1	Bromus tectorum voucher GRA 1085 chloroplast, partial genome
KY636073.1	Amblyopyrum muticum voucher 01C2100106 chloroplast, partial genome
KY636066.1	Agropyron cristatum voucher NB 2012012A chloroplast, partial genome
KY636170.1	Triticum turgidum voucher TRI 15127 chloroplast, partial genome
KY636154.1	Triticum kiharae voucher 01C0204240 chloroplast, partial genome
KY636149.1	Thinopyrum elongatum voucher PI 401117 chloroplast, partial genome
KY636123.1	Elymus stipifolius voucher PI 440095 chloroplast, partial genome
KY636044.1	Aegilops speltoides voucher PI 487231 chloroplast, partial genome
KY636022.1	Aegilops juvenalis voucher PI 542193 chloroplast, partial genome
KY636009.1	Aegilops comosa voucher AE 1378 chloroplast, partial genome
KY636002.1	Aegilops bicornis voucher AE 788 chloroplast, partial genome
KY636174.1	Triticum turgidum voucher PI 41025 chloroplast, partial genome
KY636172.1	Triticum turgidum voucher TRI 15065 chloroplast, partial genome
KY636159.1	Triticum monococcum voucher PI_427451 chloroplast, partial genome
KY636153.1	Triticum aestivum voucher TR 183 chloroplast, partial genome
KY636130.1	Elymus tauri voucher PI 330688 chloroplast, partial genome
KY636125.1	Pseudoroegneria strigosa voucher PI 499638 chloroplast, partial genome
KY636115.1	Psathyrostachys juncea voucher PI 565077 chloroplast, partial genome
KY636114.1	Psathyrostachys juncea voucher PI 222050 chloroplast, partial genome
KY636102.1	Heteranthelium piliferum voucher PI 401354 chloroplast, partial genome
KY636096.1	Eremopyrum triticeum voucher PI 502364 chloroplast, partial genome
KY636088.1	Dasypyrum villosum voucher W6 7300 chloroplast, partial genome
KY636070.1	Agropyron cristatum voucher PI 494615 chloroplast, partial genome
KY636053.1	Aegilops tauschii voucher 49116 chloroplast, partial genome
KY636030.1	Aegilops markgrafii voucher PI 596287 chloroplast, partial genome
KY636029.1	Aegilops markgrafii voucher PI 254863 chloroplast, partial genome
KY636001.1	Aegilops bicornis voucher AE 106 chloroplast, partial genome
KY635999.1	Aegilops bicornis voucher KU 5786 chloroplast, partial genome
KX255640.1	Tsuga canadensis chloroplast, partial genome
KU866532.1	Glehnia littoralis chloroplast, complete genome
KU866531.1	Peucedanum japonicum chloroplast, complete genome
KU866530.1	Peucedanum japonicum chloroplast, complete genome
KU866529.1	Ledebouriella seseloides chloroplast, complete genome
KT003925.1	Viscum album voucher C2546 chloroplast, complete genome
KT070882.1	Osyris alba voucher C2883 chloroplast, complete genome
KT070881.1	Viscum crassulae voucher C2553 chloroplast, complete genome
KJ512176.1	Viscum minimum voucher C2884 chloroplast, complete genome
KT894821.1	Paeonia veitchii voucher PANOSUBP20151011 chloroplast, complete genome
HG515539.2	Orobanche californica chloroplast complete genome, specimen voucher PAC:S.Wicke Oc54
EU273602.1	Acorus americanus chloroplast, complete genome
LC049336.1	Encephalartos lehmannii chloroplast DNA, complete genome
LC049207.1	Lepidozamia peroffskyana chloroplast DNA, complete genome
LC049070.1	Dioon spinulosum chloroplast DNA, complete genome
LC049069.1	Macrozamia mountperriensis chloroplast DNA, complete genome
LC049068.1	Ceratozamia hildae chloroplast DNA, complete genome
LC049067.1	Stangeria eriopus chloroplast DNA, complete genome
LC040885.1	Zamia furfuracea chloroplast DNA, complete genome
AP014923.1	Gnetum ula chloroplast DNA, complete genome
KX345298.1	Actinidia tetramera chloroplast, complete genome
KX345297.1	Actinidia polygama chloroplast, complete genome
KM527899.1	Pelargonium tetragonum chloroplast, complete genome
KM527897.1	Pelargonium quercifolium chloroplast, complete genome
KM527896.1	Pelargonium nanum chloroplast, complete genome
KM527894.1	Pelargonium incrassatum chloroplast, complete genome
KM527893.1	Pelargonium fulgidum chloroplast, complete genome
KM527892.1	Pelargonium exstipulatum chloroplast, complete genome
KM527891.1	Pelargonium echinatum chloroplast, complete genome
KM527890.1	Pelargonium exhibens chloroplast, complete genome
KM527888.1	Pelargonium citronellum chloroplast, complete genome
KM527887.1	Pelargonium cucullatum chloroplast, complete genome
KT834974.1	Abies nephrolepis chloroplast, complete genome
KU212372.1	UNVERIFIED: Striga hermonthica chloroplast sequence
KU212369.1	UNVERIFIED: Triphysaria versicolor chloroplast sequence
KU361241.1	Taraxacum officinale chloroplast, complete genome
KU230438.1	Lilium tsingtauense chloroplast, complete genome
KJ531443.1	Oldeania alpina plastid, partial genome
KJ531442.1	Indocalamus sinicus plastid, partial genome
JN160605.1	Wolffia australiana strain 7733 chloroplast, complete genome
JN160604.1	Wolffiella lingulata strain 7289 chloroplast, complete genome
JF937588.1	Ricinus communis cultivar Hale chloroplast, complete genome
JF317356.1	Gossypium sturtianum chloroplast, complete genome
JF317355.1	Gossypium stocksii chloroplast, complete genome
JF317354.1	Gossypium longicalyx chloroplast, complete genome
JF317353.1	Gossypium herbaceum chloroplast, complete genome
JF317352.1	Gossypium bickii chloroplast, complete genome
JF317351.1	Gossypium anomalum chloroplast, complete genome
EU549769.1	Guizotia abyssinica chloroplast, complete genome
EU189132.1	Cuscuta exaltata chloroplast, complete genome
DQ226511.1	Morus indica chloroplast, complete genome
DQ317523.1	Glycine max cultivar PI 437654 chloroplast, complete genome
KU551263.1	Cephalanthera longifolia voucher STET 1163 (PE) chloroplast, complete genome
EU998746.4	Pinus nelsonii chloroplast, complete genome
EU998745.4	Pinus monophylla chloroplast, complete genome
EU998743.4	Pinus lambertiana chloroplast, complete genome
FJ899583.2	Pinus pinaster chloroplast, partial genome
FJ899576.2	Pinus flexilis chloroplast, partial genome
FJ899572.2	Pinus canariensis chloroplast, partial genome
FJ899567.2	Pinus aristata chloroplast, partial genome
FJ899555.2	Pinus ponderosa chloroplast, partial genome
EU998740.4	Pinus contorta chloroplast, complete genome
EU998742.4	Pinus krempfii chloroplast, complete genome
EU998741.4	Pinus gerardiana chloroplast, complete genome
HQ713469.1	Erodium carvifolium chloroplast, complete genome
HM778032.1	Cheilanthes lindheimeri chloroplast, complete genome
HM222519.1	Ptilidium pulcherrimum chloroplast, complete genome
HM535629.1	Pteridium aquilinum subsp. aquilinum chloroplast, complete genome
GU191333.1	Isoetes flaccida chloroplast, complete genome
GU907100.1	Gossypium thurberi chloroplast, complete genome
GQ324949.1	Oncidium Gower Ramsey chloroplast, complete genome
FJ899564.2	Pinus torreyana subsp. torreyana chloroplast, partial genome
GQ893027.1	Vigna radiata cultivar kampangsan1 chloroplast, complete genome
FJ970916.1	Dendrocalamus latiflorus chloroplast, complete genome
GQ329703.1	Anomochloa marantoidea chloroplast, complete genome
FJ899582.1	Pinus peuce chloroplast, partial genome
FJ899581.1	Pinus parviflora var. pentaphylla chloroplast, partial genome
FJ899580.1	Pinus monticola chloroplast, partial genome
FJ899577.1	Pinus lambertiana chloroplast, partial genome
FJ899575.1	Pinus leiophylla var. chihuahuana chloroplast, partial genome
FJ899571.1	Pinus banksiana chloroplast, partial genome
FJ899570.1	Pinus ayacahuite chloroplast, partial genome
FJ899566.1	Pinus albicaulis chloroplast, partial genome
FJ899562.1	Pinus thunbergii chloroplast, partial genome
FJ899559.1	Pinus squamata chloroplast, partial genome
FJ899557.1	Pinus rzedowskii chloroplast, partial genome
FJ899556.1	Pinus resinosa chloroplast, partial genome
EU998739.3	Picea sitchensis chloroplast, complete genome
FJ556581.1	Alsophila spinulosa chloroplast, complete genome
EF380351.1	Buxus microphylla chloroplast, complete genome
KT321318.1	Zanthoxylum schinifolium isolate IM2014_ZS chloroplast, complete genome
KT159969.1	Gentiana robusta chloroplast, complete genome
FJ466687.2	Festuca arundinacea cultivar KY-31 chloroplast, complete genome
EF115541.1	Hordeum vulgare subsp. vulgare cultivar Morex chloroplast, complete genome
DQ865976.1	Cucumis sativus strain CHIPPER chloroplast, complete genome
DQ821119.1	Angiopteris evecta chloroplast, complete genome
X04465.1	Marchantia paleacea chloroplast genome DNA
LC095867.1	Pseudolarix amabilis chloroplast DNA, complete genome
KT336489.2	Utricularia reniformis chloroplast, complete genome
KX255674.1	Pinus fenzeliana var. dabeshanensis voucher PDBS20160514 chloroplast, complete genome
KX180092.1	Parinari oblongifolia chloroplast, complete genome
KX180091.1	Parinari curatellifolia chloroplast, complete genome
KX180090.1	Parinari capensis chloroplast, complete genome
KX180089.1	Parastemon urophyllus chloroplast, complete genome
KX180088.1	Neocarya macrophylla chloroplast, complete genome
KX180087.1	Maranthes kerstingii chloroplast, complete genome
KX180086.1	Maranthes glabra chloroplast, complete genome
KX180085.1	Maranthes gabunensis chloroplast, complete genome
KX180084.1	Magnistipula butayei chloroplast, complete genome
KX180082.1	Licania ovalifolia chloroplast, complete genome
KX180081.1	Licania minutiflora chloroplast, complete genome
KX180080.1	Licania micrantha chloroplast, complete genome
KX180079.1	Licania michauxii chloroplast, complete genome
KX180078.1	Licania membranacea chloroplast, complete genome
KX180077.1	Licania majuscula chloroplast, complete genome
KX180076.1	Licania macrophylla chloroplast, complete genome
KX180075.1	Licania glabriflora chloroplast, complete genome
KX180074.1	Licania canescens chloroplast, complete genome
KX180073.1	Kostermanthus robustus chloroplast, complete genome
KX180072.1	Hunga gerontogea chloroplast, complete genome
KX180071.1	Hirtella zanzibarica chloroplast, complete genome
KX180070.1	Hirtella suffulta chloroplast, complete genome
KX180069.1	Hirtella racemosa chloroplast, complete genome
KX180068.1	Hirtella macrosepala chloroplast, complete genome
KX180067.1	Grangeria borbonica chloroplast, complete genome
KX180066.1	Gaulettia elata chloroplast, complete genome
KX180065.1	Exellodendron barbatum chloroplast, complete genome
KX180064.1	Dactyladenia floretii chloroplast, complete genome
KX180063.1	Dactyladenia buchneri chloroplast, complete genome
KX180062.1	Dactyladenia bellayana chloroplast, complete genome
KX180061.1	Couepia subcordata chloroplast, complete genome
KX180060.1	Couepia sandwithii chloroplast, complete genome
KX180059.1	Couepia rankiniae chloroplast, complete genome
KX180058.1	Couepia polyandra chloroplast, complete genome
KX180057.1	Couepia paraensis subsp. cerradoana chloroplast, complete genome
KX180056.1	Couepia paraensis chloroplast, complete genome
KX180055.1	Couepia ovalifolia chloroplast, complete genome
KX180053.1	Couepia caryophylloides chloroplast, complete genome
KX180052.1	Atuna racemosa chloroplast, complete genome
KX180051.1	Angelesia splendens chloroplast, complete genome
KX180050.1	Afrolicania elaeosperma chloroplast, complete genome
KX029327.1	Glycine gracilis chloroplast, complete genome
KM491711.2	Morus mongolica chloroplast, complete genome
KU355276.1	Morus alba var. atropurpurea chloroplast, complete genome
KT805945.1	Paris polyphylla var. yunnanensis chloroplast, complete genome
KU310542.1	Iochroma umbellatum chloroplast, complete genome
KR259987.1	Citrus platymamma chloroplast, complete genome
KR232944.1	Urochloa humidicola chloroplast, complete genome
KR232943.1	Urochloa ruziziensis chloroplast, complete genome
KR232942.1	Urochloa brizantha chloroplast, complete genome
KR232941.1	Urochloa decumbens chloroplast, complete genome
KJ468104.1	Vigna unguiculata chloroplast, complete genome
KJ468101.1	Prosopis glandulosa chloroplast, complete genome
KJ468100.1	Pachyrhizus erosus chloroplast, complete genome
KJ468097.1	Haematoxylum brasiletto chloroplast, complete genome
KU355297.1	Morus alba var. multicaulis chloroplast, complete genome
KP125338.1	Gloriosa superba chloroplast, complete genome
KU522473.1	Epimedium pseudowushanense chloroplast, complete genome
KU522472.1	Epimedium lishihchenii chloroplast, complete genome
KU522471.1	Epimedium koreanum chloroplast, complete genome
KU522470.1	Epimedium dolichostemon chloroplast, complete genome
KU522469.1	Epimedium acuminatum chloroplast, complete genome
KT692739.1	Monsonia marlothii chloroplast, complete genome
KT692738.1	Monsonia emarginata chloroplast, complete genome
KT376489.1	Lilium distichum chloroplast, complete genome
KF856619.1	Cercis canadensis chloroplast, complete genome
KT966716.1	Kolkwitzia amabilis chloroplast, complete genome
KT148967.1	Aquilaria sinensis chloroplast, complete genome
KP412541.1	Pinus armandii voucher Parm2014 chloroplast, complete genome
KU242342.1	Echinochloa frumentacea cultivar CO(KV)2 chloroplast, complete genome
KU724141.1	Stachys byzantina strain CL1004 chloroplast, complete genome
KU724140.1	Stachys sylvatica strain LVA358 chloroplast, complete genome
KU724139.1	Stachys coccinea strain CL1003 chloroplast, complete genome
KU724138.1	Stachys chamissonis strain CL1002 chloroplast, complete genome
KU724137.1	Haplostachys linearifolia strain JFR14025/JFR7025 chloroplast, partial genome
KU724136.1	Stenogyne kanehoana strain HSJ14046 chloroplast, complete genome
KU724135.1	Stenogyne sessilis strain HI0367 chloroplast, partial genome
KU724134.1	Phyllostegia velutina strain HI0361 chloroplast, complete genome
KU724133.1	Haplostachys haplostachya strain HI0333 chloroplast, complete genome
KU724132.1	Stenogyne bifida strain HI0332 chloroplast, complete genome
KU724131.1	Phyllostegia waimeae strain HI0327 chloroplast, partial genome
KU724130.1	Stenogyne haliakalae strain GEO5 chloroplast, complete genome
KT921177.1	UNVERIFIED: Saltugilia splendens subsp. splendens chloroplast sequence
KT921171.1	UNVERIFIED: Saltugilia australis chloroplast sequence
KU310932.1	Iochroma cardenasianum chloroplast, complete genome
KU170194.1	Pedicularis ishidoyana chloroplast, complete genome
KU168830.1	Drosera rotundifolia chloroplast, complete genome
KT748629.1	Schefflera heptaphylla chloroplast, complete genome
KP318983.1	Diplopanax stachyanthus voucher DSTACH20141227 chloroplast, complete genome
KT695602.1	Bletilla ochracea chloroplast, complete genome
KU095851.1	UNVERIFIED: Tetraplodon fuegianus chloroplast sequence
KU204905.1	Papaver somniferum chloroplast, complete genome
KU204899.1	Epimedium sagittatum chloroplast, complete genome
KT934315.1	Boswellia sacra chloroplast, complete genome
KT200359.1	Wisteria sinensis chloroplast, complete genome
KT027377.1	Torreya fargesii chloroplast, complete genome
KT983629.1	Stipa purpurea voucher SPUR20151101 chloroplast, complete genome
KT337318.1	Picea jezoensis chloroplast, complete genome
KT962228.1	Hordeum vulgare subsp. vulgare chloroplast, complete genome
KM103376.1	Wisteria floribunda voucher IRGC105690 from South Korea chloroplast, complete genome
KT886432.1	Goodyera velutina chloroplast, complete genome
KT962040.1	Silene latifolia subsp. alba cultivar K-line chloroplast, complete genome
KT962039.1	Silene latifolia subsp. alba cultivar K-line chloroplast, complete genome
KT934791.1	Ephedra foeminea voucher K. Bolinder 542 chloroplast, complete genome
KT033563.1	Tetrastigma hemsleyanum chloroplast, complete genome
LN866848.1	Ionopsidium acaule chloroplast genome, complete sequence, isolate Iacau_1072
KM489055.2	Solanum nigrum chloroplast, complete genome
JX280391.1	Magnolia acuminata var. acuminata chloroplast, complete genome
KT445939.1	Sinopodophyllum hexandrum chloroplast, complete genome
KT626943.1	Iris sanguinea chloroplast, complete genome
KT723438.2	Pinus sibirica chloroplast, complete genome
KR967361.1	Curcuma flaviflora chloroplast, complete genome
KP189363.1	Cyrtomium falcatum voucher YNUH DDCF2014 chloroplast, complete genome
KT852576.1	Gynochthodes nanlingensis chloroplast, complete genome
KT634228.1	Picea glauca chloroplast, complete genome
KP205432.1	Masdevallia coccinea chloroplast, complete genome
KM032625.1	Phragmipedium longifolium voucher Whitten 2804 chloroplast, complete genome
KM032623.1	Sobralia callosa voucher Whitten 3275 chloroplast, complete genome
KT599101.1	Woodwardia unigemmata chloroplast, complete genome
KT599100.1	Cyrtomium devexiscapulae chloroplast, complete genome
KT740995.1	Pinus tabuliformis voucher PTAB20150818V5 chloroplast, complete genome
KT630835.1	Polygonatum cyrtonema chloroplast, complete genome
KM016695.1	Mesembryanthemum crystallinum chloroplast, complete genome
KT588924.1	Bletilla striata chloroplast, complete genome
KR873010.1	Pinus bungeana voucher Pbungeana2015 chloroplast, complete genome
KT581449.1	Brassica juncea chloroplast, complete genome
KT428378.1	Pseudosasa japonica isolate Pjc_a-1 cultivar akebonosuji chloroplast, complete genome
KT428377.1	Pseudosasa japonica isolate Pjc-1 cultivar akebonosuji chloroplast, complete genome
KT375308.1	Solanum nigrum chloroplast, complete genome
KT368151.1	Ficus racemosa chloroplast, complete genome
KR230391.1	Beta vulgaris subsp. vulgaris cultivar KWS2320 chloroplast, complete genome
KT153018.1	Zanthoxylum piperitum chloroplast, complete genome
KM459517.1	Pelargonium australe chloroplast, complete genome
KM459516.1	Pelargonium cotyledonis chloroplast, complete genome
KM459515.1	Pelargonium dichondrifolium chloroplast, complete genome
KT266264.1	Humulus lupulus chloroplast, complete genome
KT272174.1	Larrea tridentata chloroplast, complete genome
LC035012.1	Marchantia paleacea subsp. diptera chloroplast DNA, complete genome
KR061358.1	Metasequoia glyptostroboides chloroplast, complete genome
KM881643.1	Oryza officinalis chloroplast, complete genome
KM881642.1	Oryza longistaminata isolate 81953 chloroplast, complete genome
KM881641.1	Oryza longistaminata isolate 103905 chloroplast, complete genome
KM881640.1	Oryza glumipatula chloroplast, complete genome
KM881639.1	Oryza glaberrima isolate 101328 chloroplast, complete genome
KM881638.1	Oryza glaberrima isolate 104040 chloroplast, complete genome
KM881637.1	Oryza barthii isolate 86481 chloroplast, complete genome
KM881636.1	Oryza barthii isolate 104124 chloroplast, complete genome
KM881635.1	Oryza barthii isolate 101381 chloroplast, complete genome
KR869730.1	Morinda officinalis chloroplast, complete genome
KT281146.1	Alloteropsis angusta isolate 3C chloroplast, complete genome
KM281675.1	Sedum oryzifolium chloroplast, complete genome
KR296655.1	Alocasia macrorrhizos chloroplast, partial genome
KP404631.1	UNVERIFIED: Perilla frutescens chloroplast sequence
KP404630.1	UNVERIFIED: Fagopyrum cymosum chloroplast sequence
KP404629.1	UNVERIFIED: Dioscorea nipponica chloroplast sequence
KP404628.1	UNVERIFIED: Carthamus tinctorius chloroplast sequence
KR779994.1	Sinopodophyllum hexandrum voucher SHEX20150512 chloroplast, complete genome
KP256024.1	Chloranthus japonicus voucher CJCP20141206 chloroplast, complete genome
KF150644.2	Andrographis paniculata chloroplast, complete genome
KF356392.1	Neyraudia reynaudiana chloroplast, complete genome
KC968977.1	Lilium longiflorum chloroplast, complete genome
KC968976.1	Alstroemeria aurea chloroplast, complete genome
JN867585.1	Ginkgo biloba voucher BJ017 chloroplast, complete genome
JN867578.1	Ginkgo biloba voucher SNJ035 chloroplast, complete genome
JN654343.1	Ginkgo biloba isolate WC044 chloroplast, complete genome
FJ597983.1	Megaleranthis saniculifolia chloroplast, complete genome
EU254477.1	Fagopyrum esculentum subsp. ancestrale chloroplast, complete genome
EU342371.1	Welwitschia mirabilis chloroplast, complete genome
EU196765.1	Phaseolus vulgaris chloroplast, complete genome
EF614270.1	Ceratophyllum demersum chloroplast, complete genome
EF380352.1	Chloranthus spicatus chloroplast, complete genome
DQ923117.1	Nandina domestica chloroplast, complete genome
DQ897681.1	Pelargonium x hortorum chloroplast, complete genome
DQ887676.1	Drimys granadensis chloroplast, complete genome
DQ886273.1	Phaseolus vulgaris cultivar Negro Jamapa chloroplast, complete genome
DQ673255.1	Jasminum nudiflorum chloroplast, complete genome
DQ400350.1	Lemna minor chloroplast, complete genome
DQ345959.1	Gossypium hirsutum cultivar coker 310 FR chloroplast, complete genome
DQ354691.1	Nuphar advena chloroplast, complete genome
AY582139.1	Panax ginseng chloroplast, complete genome
KM088016.1	Oryza sativa Japonica Group cultivar Nipponbare chloroplast, complete genome
KM088015.1	Allium cepa strain CMS-T chloroplast, complete genome
KM088014.1	Allium cepa strain CMS-S chloroplast, complete genome
KM088013.1	Allium cepa chloroplast, complete genome
KM103365.1	Lilium tsingtauense voucher KNU IT No. 121054-1 from South Korea chloroplast, complete genome
KM103364.1	Lilium hansonii chloroplast, complete genome
KT164771.1	Carnegiea gigantea chloroplast, complete genome
KP462881.1	Campynema lineare voucher K:Duretto, M.F.:1842 chloroplast, complete genome
KR780582.1	Amentotaxus argotaenia chloroplast, complete genome
KP297245.1	Actinidia chinensis isolate AD-6 chloroplast, complete genome
KP297244.1	Actinidia deliciosa isolate AD-4 chloroplast, complete genome
KP297243.1	Actinidia chinensis isolate Ac-4 chloroplast, complete genome
KP297242.1	Actinidia chinensis isolate AC-2 chloroplast, complete genome
AP014692.1	Vigna radiata var. sublobata chloroplast DNA, complete sequence, cultivar: TC1966
AP014691.1	Vigna radiata var. radiata chloroplast DNA, complete sequence, cultivar: NM92
KP718889.1	UNVERIFIED: Fragaria virginiana isolate PI657872 chloroplast sequence
KP718888.1	UNVERIFIED: Fragaria vesca subsp. bracteata isolate LNF23 chloroplast sequence
KP718887.1	UNVERIFIED: Fragaria iinumae isolate PI637967 chloroplast sequence
KP718886.1	UNVERIFIED: Fragaria vesca subsp. bracteata isolate MRD60 chloroplast sequence
KP718885.1	UNVERIFIED: Fragaria mandshurica isolate PI657855 chloroplast sequence
KP718884.1	UNVERIFIED: Fragaria chiloensis isolate SAL3 chloroplast sequence
KM881634.1	Oryza barthii isolate 103590 chloroplast, complete genome
KP221714.1	UNVERIFIED: Oenocarpus minor chloroplast sequence
KP221713.1	UNVERIFIED: Oenocarpus bataua chloroplast sequence
KP221712.1	UNVERIFIED: Manicaria saccifera chloroplast sequence
KP221711.1	UNVERIFIED: Leopoldinia pulchra chloroplast sequence
KP221710.1	UNVERIFIED: Kentiopsis piersoniorum chloroplast sequence
KP221709.1	UNVERIFIED: Iriartea deltoidea chloroplast sequence
KP221708.1	UNVERIFIED: Hydriastele microspadix chloroplast sequence
KP221707.1	UNVERIFIED: Heterospathe cagayanensis chloroplast sequence
KP221706.1	UNVERIFIED: Geonoma undata subsp. dussiana chloroplast sequence
KP221705.1	UNVERIFIED: Dypsis decaryi chloroplast sequence
KP221704.1	UNVERIFIED: Drymophloeus litigiosus chloroplast sequence
KP221703.1	UNVERIFIED: Dictyosperma album chloroplast sequence
KP221702.1	UNVERIFIED: Burretiokentia grandiflora chloroplast sequence
KP221701.1	UNVERIFIED: Beccariophoenix madagascariensis chloroplast sequence
KP221700.1	UNVERIFIED: Bactris major chloroplast sequence
KP221699.1	UNVERIFIED: Attalea speciosa chloroplast sequence
KP221698.1	UNVERIFIED: Areca vestiaria chloroplast sequence
KP221697.1	UNVERIFIED: Veitchia spiralis chloroplast sequence
KP221696.1	UNVERIFIED: Sclerosperma profizianum chloroplast sequence
KP221695.1	UNVERIFIED: Satakentia liukiuensis chloroplast sequence
KP221694.1	UNVERIFIED: Reinhardtia simplex chloroplast sequence
KP221693.1	UNVERIFIED: Reinhardtia paiewonskiana chloroplast sequence
KP221692.1	UNVERIFIED: Roystonea regia chloroplast sequence
KP221691.1	UNVERIFIED: Reinhardtia latisecta chloroplast sequence
KP221690.1	UNVERIFIED: Reinhardtia gracilis chloroplast sequence
KP221689.1	UNVERIFIED: Prestoea acuminata var. montana chloroplast sequence
KP221687.1	UNVERIFIED: Pelagodoxa henryana chloroplast sequence
KP221686.1	UNVERIFIED: Orania palindan chloroplast sequence
KR297062.1	UNVERIFIED: Pulsatilla vernalis voucher OL-PV116A chloroplast sequence
KR297061.1	UNVERIFIED: Pulsatilla vernalis voucher OL-PV115A chloroplast sequence
KR297060.1	UNVERIFIED: Pulsatilla pratensis voucher OL-PPR112A chloroplast sequence
KR297059.1	UNVERIFIED: Pulsatilla pratensis voucher OL-PPR110A chloroplast sequence
KR297058.1	UNVERIFIED: Anemone patens voucher OL-PPKOL01 chloroplast sequence
KR297057.1	UNVERIFIED: Anemone patens voucher OL-PPWLO01 chloroplast sequence
KP771703.1	Pinus taiwanensis voucher Ptaiwanensis14 chloroplast, complete genome
KP259800.1	Wollemia nobilis voucher AF20030492AC chloroplast, complete genome
KR347117.1	Podococcus barteri chloroplast, complete genome
KR262889.1	Dieffenbachia seguine chloroplast, complete genome
KM078036.1	Heloniopsis tubiflora chloroplast, complete genome
KJ629117.1	Salicornia bigelovii chloroplast, complete genome
KJ629116.1	Salicornia europaea chloroplast, complete genome
KJ629115.1	Salicornia brachiata chloroplast, complete genome
KM201427.1	Fagopyrum tataricum strain Daegwan3-3 chloroplast, complete genome
KJ850242.1	Vicia sativa chloroplast, complete genome
KJ850239.1	Lens culinaris cultivar Northfield chloroplast, complete genome
KJ850237.1	Lathyrus odoratus cultivar Cupani chloroplast, complete genome
KP280175.1	Iochroma tingoanum chloroplast, complete genome
KP939360.1	Morus notabilis chloroplast, complete genome
KJ806202.1	Lathyrus venosus chloroplast, complete genome
KJ806201.1	Lathyrus sativus chloroplast, complete genome
KJ806199.1	Lathyrus palustris chloroplast, complete genome
KJ806198.1	Lathyrus ochroleucus chloroplast, complete genome
KJ806197.1	Lathyrus ochroleucus chloroplast, complete genome
KJ806196.1	Lathyrus littoralis chloroplast, complete genome
KJ806195.1	Lathyrus japonicus chloroplast, complete genome
KJ806194.1	Lathyrus japonicus chloroplast, complete genome
KJ806193.1	Lathyrus graminifolius chloroplast, complete genome
KJ806192.1	Lathyrus davidii chloroplast, complete genome
KJ701602.1	Erodium chrysanthum chloroplast, complete genome
KP212149.1	Ipomoea batatas cultivar Xushu 18 chloroplast, complete genome
KP765733.1	Nyholmiella obtusifolia chloroplast, complete genome
KP340971.1	Quercus aquifolioides chloroplast, complete genome
KP688069.1	Hibiscus syriacus chloroplast, complete genome
KP308151.1	Dunalia brachyacantha chloroplast, complete genome
JQ742090.1	Gossypium turneri chloroplast, complete genome
KP742350.1	Abies koreana chloroplast, complete genome
KJ523886.1	Erodium absinthoides chloroplast, complete genome
KJ170923.1	Lonicera japonica chloroplast, complete genome
KP280057.1	Dunalia obovata chloroplast, complete genome
KJ566305.1	Masdevallia picturata chloroplast, complete genome
KJ524105.1	Paphiopedilum niveum chloroplast, complete genome
KJ524104.1	Habenaria pantlingiana chloroplast, complete genome
KJ501999.1	Goodyera fumata chloroplast, complete genome
KP411231.1	UNVERIFIED: Iochroma calycinum chloroplast sequence
KP168671.1	Cattleya crispata chloroplast, complete genome
KM678430.1	Araucaria laubenfelsii voucher 601 chloroplast, partial genome
KM678429.1	Araucaria nemorosa voucher 3066 chloroplast, partial genome
KM678428.1	Araucaria bernieri voucher 47 chloroplast, partial genome
KM678427.1	Araucaria humboldtensis voucher 42 chloroplast, partial genome
KM678426.1	Araucaria nemorosa voucher 4010 chloroplast, partial genome
KM678425.1	Araucaria rulei voucher 73 chloroplast, partial genome
KM678424.1	Araucaria schmidii chloroplast, partial genome
KM678423.1	Araucaria laubenfelsii voucher 4055 chloroplast, partial genome
KM678422.1	Araucaria montana voucher 125 chloroplast, partial genome
KM678421.1	Araucaria montana voucher 4246 chloroplast, partial genome
KM678420.1	Araucaria subulata voucher 577 chloroplast, partial genome
KM678419.1	Araucaria muelleri voucher GORO446 chloroplast, partial genome
KM678418.1	Araucaria biramulata voucher 176 chloroplast, partial genome
KM678417.1	Araucaria columnaris chloroplast, partial genome
KM678416.1	Araucaria subulata voucher 679 chloroplast, partial genome
KM678415.1	Araucaria biramulata voucher 4061 chloroplast, partial genome
KM678414.1	Araucaria humboldtensis voucher 116 chloroplast, partial genome
KM678413.1	Araucaria columnaris voucher 128 chloroplast, partial genome
KM678412.1	Araucaria scopulorum voucher 82 chloroplast, partial genome
KM678411.1	Araucaria rulei voucher 170 chloroplast, partial genome
KM678410.1	Araucaria columnaris voucher 806 chloroplast, partial genome
KM678409.1	Araucaria subulata voucher 69 chloroplast, partial genome
KM678408.1	Araucaria luxurians voucher 385 chloroplast, partial genome
KM678407.1	Araucaria bernieri voucher 670 chloroplast, partial genome
KM678406.1	Araucaria muelleri voucher 5054 chloroplast, partial genome
KM678405.1	Araucaria scopulorum voucher 154 chloroplast, partial genome
KM678404.1	Araucaria muelleri voucher 18 chloroplast, partial genome
KC817463.1	Arundinaria tecta chloroplast, complete genome
KJ000048.2	Echinochloa oryzicola chloroplast, complete genome
KJ000047.1	Echinochloa crus-galli var. crus-galli chloroplast, complete genome
KC686331.1	Panax ginseng isolate damaya chloroplast, complete genome
KC686333.1	Panax ginseng isolate gaolishen chloroplast, complete genome
KC686332.1	Panax ginseng isolate ermaya chloroplast, complete genome
AP014574.1	Amentotaxus formosana chloroplast DNA, complete sequence
KP136832.1	Polypodium glycyrrhiza chloroplast, partial genome
KP136831.1	Plagiogyria glauca chloroplast, partial genome
KP136830.1	Cystopteris protrusa chloroplast, partial genome
AP014632.1	Ananas comosus chloroplast DNA, complete genome
KP119739.1	Orthotrichum rogeri chloroplast, complete genome
KJ123753.1	Rhazya stricta chloroplast, complete genome
KJ206533.1	Paeonia obovata chloroplast, complete genome
KF954541.1	Sedum takesimense chloroplast, complete genome
JX416858.1	Stangeria eriopus chloroplast, complete genome
JX416857.1	Zamia furfuracea chloroplast, complete genome
JX407108.1	Ceratozamia hildae chloroplast, complete genome
JX402774.1	Bowenia serrulata chloroplast, complete genome
KM652489.1	Clematis fusca var. coreana voucher PG003 chloroplast, complete genome
KJ788292.1	Trifolium strictum chloroplast, complete genome
KJ788291.1	UNVERIFIED: Trifolium semipilosum chloroplast sequence
KJ788289.1	UNVERIFIED: Trifolium occidentale chloroplast sequence
KJ788286.1	UNVERIFIED: Trifolium hybridum chloroplast sequence
KJ788285.1	Trifolium glanduliferum chloroplast, complete genome
KJ788288.1	UNVERIFIED: Trifolium meduseum chloroplast sequence
KJ788287.1	UNVERIFIED: Trifolium lupinaster chloroplast sequence
KM111545.1	Sanionia uncinata chloroplast, complete genome
HG803177.1	Utricularia macrorhiza chloroplast, complete genome
AB976560.1	Triticum timopheevii chloroplast DNA, complete genome
KM454982.1	Sapindus mukorossi chloroplast, complete genome
KF428978.1	Oryza rufipogon chloroplast, complete genome
KM233640.1	Luzuriaga radicans chloroplast, complete genome
KM052729.1	Ceratopteris richardii chloroplast, partial genome
KJ476730.1	Trifolium meduseum chloroplast, complete genome
KJ996106.1	UNVERIFIED: Camellia sinensis chloroplast sequence
KF753635.1	Calanthe triplicata chloroplast, complete genome
KF753634.1	Primula poissonii chloroplast, complete genome
KF753633.1	Nymphaea mexicana chloroplast, complete genome
KF922320.1	Praxelis clematidea chloroplast, complete genome
KJ624919.1	Populus euphratica chloroplast, complete genome
JX513421.1	Indocalamus wilsonii chloroplast, complete genome
JN160603.2	Spirodela polyrhiza strain 7498 chloroplast, complete genome
KJ477692.1	Hanabusaya asiatica voucher Yoo86859 chloroplast, complete genome
AB601120.1	Pseudotsuga sinensis var. wilsoniana chloroplast DNA, complete genome
AB480556.1	Picea morrisonicola chloroplast DNA, complete genome
EU849487.1	Trifolium subterraneum chloroplast, complete genome
HF586694.1	Salvia miltiorrhiza chloroplast complete genome
AB830884.1	Agathis dammara chloroplast DNA, complete genome
KJ817846.1	Tetraphis pellucida chloroplast, complete genome
KC817303.1	UNVERIFIED: Rumex acetosa chloroplast sequence
KJ619462.1	Capsicum annuum var. glabriusculum chloroplast, complete genome
KF225592.1	Osmundastrum cinnamomeum chloroplast, complete genome
KJ414486.1	Parinari campestris chloroplast, complete genome
KJ414485.1	Hirtella physophora chloroplast, complete genome
KJ414484.1	Licania sprucei chloroplast, complete genome
KJ414483.1	Licania alba chloroplast, complete genome
KJ414482.1	Couepia guianensis chloroplast, complete genome
KJ414481.1	Licania heteromorpha chloroplast, complete genome
KJ414480.1	Chrysobalanus icaco chloroplast, complete genome
KJ414479.1	Hirtella racemosa chloroplast, complete genome
KF866300.1	Juniperus virginiana chloroplast, complete genome
KF866299.1	Juniperus scopulorum chloroplast, complete genome
KF866298.1	Juniperus monosperma chloroplast, complete genome
KF866297.1	Juniperus bermudiana chloroplast, complete genome
AP005672.1	Physcomitrella patens chloroplast DNA, complete genome
KJ123824.1	Taxus mairei chloroplast, complete genome
KF990556.1	Trigonobalanus doichangensis chloroplast, complete genome
KC912689.1	Hordeum vulgare subsp. spontaneum chloroplast, complete genome
KC912688.1	Hordeum vulgare subsp. spontaneum chloroplast, complete genome
KC912687.1	Hordeum vulgare subsp. vulgare chloroplast, complete genome
KF527887.1	Silene paradoxa chloroplast, complete genome
KF527886.1	Silene chalcedonica chloroplast, complete genome
HF937082.1	Picea abies chloroplast complete genome
KF986530.1	Azadirachta indica chloroplast, complete genome
KF240617.1	Pelargonium alternans chloroplast, complete genome
KF240616.1	Hypseocharis bilobata chloroplast, complete genome
KF951065.1	Chionographis japonica chloroplast, partial genome
HG803178.1	Pinguicula ehlersiae chloroplast, complete genome
HF934132.1	Arabis alpina complete chloroplast genome
JX436155.1	Penthorum chinense chloroplast, complete genome
JX427551.1	Sedum sarmentosum chloroplast, complete genome
KF437397.2	Veratrum patulum chloroplast, complete genome
HG738866.1	Schwalbea americana chloroplast genome
JQ067650.2	Arbutus unedo chloroplast, complete genome
KC180802.1	Corymbia eximia chloroplast, complete genome
KF611800.1	Glycine soja chloroplast, complete genome
HG530133.1	Lindenbergia philippensis chloroplast complete genome
KF562709.1	Oryza rufipogon cultivar DongXiang chloroplast, complete genome
KF242485.1	Ipomoea involucrata chloroplast, partial genome
KF242483.1	Ipomoea eriocarpa chloroplast, partial genome
KC536646.1	Marsilea crenata chloroplast, complete genome
KC536645.1	Lygodium japonicum chloroplast, complete genome
JX978472.1	Najas flexilis chloroplast, complete genome
KC893640.1	Glycine tomentella voucher CSIRO:G1316 chloroplast, partial genome
KC893639.1	Glycine tomentella chloroplast, partial genome
KC893638.1	Glycine syndetika voucher CSIRO:G1300 chloroplast, complete genome
KC893637.1	Glycine falcata voucher CSIRO:G1718 chloroplast, complete genome
KC893636.1	Glycine dolichocarpa voucher CSIRO:G1134 chloroplast, complete genome
KC893635.1	Glycine canescens voucher CSIRO:G1232 chloroplast, complete genome
KC893634.1	Glycine stenophita voucher CSIRO:G1974 chloroplast, complete genome
KC893633.1	Glycine tomentella voucher CSIRO:G1403 chloroplast, complete genome
KC893632.1	Glycine cyrtoloba voucher CSIRO:G1267 chloroplast, complete genome
KC997777.1	Utricularia gibba chloroplast, complete genome
KC427274.1	Taiwania flousiana chloroplast, complete genome
KC427272.1	Pinus massoniana chloroplast, complete genome
KC427270.1	Cunninghamia lanceolata chloroplast, complete genome
KC876127.1	Cymbidium tracyanum voucher KUN:YJB100606 chloroplast, complete genome
AP012265.1	Cephalotaxus wilsoniana chloroplast DNA, complete sequence
AP012266.1	Taiwania cryptomerioides chloroplast DNA, complete sequence
KC136217.1	Cephalotaxus oliveri chloroplast, complete genome
AP012598.1	Vigna angularis chloroplast DNA, complete sequence
JX293720.1	Artemisia frigida chloroplast, complete genome
KC306742.1	Podocarpus totara chloroplast, complete genome
KC117179.1	Psilotum nudum chloroplast, complete genome
JN867586.1	Taxus mairei voucher NN014 chloroplast, complete genome
JN867591.1	Taxus mairei voucher SNJ046 chloroplast, complete genome
JN867590.1	Taxus mairei voucher WC052 chloroplast, complete genome
JX235348.1	Cryptochloa strictiflora chloroplast, partial genome
JN867588.1	Cycas revoluta chloroplast, complete genome
JN867583.1	Ginkgo biloba voucher NJ032 chloroplast, complete genome
JN867579.1	Magnolia officinalis chloroplast, complete genome
KC117178.1	Ophioglossum californicum chloroplast, complete genome
KC117177.1	Equisetum hyemale chloroplast, complete genome
JX051651.1	Kingia australis chloroplast, partial genome
JX827163.1	Pellia endiviifolia chloroplast, complete genome
JQ362483.1	Chrysanthemum x morifolium chloroplast, complete genome
JN673818.2	Millettia pinnata chloroplast, complete genome
JN854152.1	Pinus yecorensis isolate YECO02 chloroplast, partial genome
JQ310743.1	Elodea canadensis chloroplast, complete genome
JN854217.1	Pinus clausa isolate CLAU02 chloroplast, partial genome
JN854216.1	Pinus arizonica var. cooperi isolate COOP01 chloroplast, partial genome
JN854215.1	Pinus coulteri isolate COUL03 chloroplast, partial genome
JN854213.1	Pinus culminicola isolate CULM01 chloroplast, partial genome
JN854212.1	Pinus fenzeliana var. dabeshanensis isolate DABE01 chloroplast, partial genome
JN854211.1	Pinus dalatensis isolate DALA03 chloroplast, partial genome
JN854209.1	Pinus densata isolate DENT01 chloroplast, partial genome
JN854208.1	Pinus devoniana isolate DEVO02 chloroplast, partial genome
JN854207.1	Pinus discolor isolate DISC02 chloroplast, partial genome
JN854206.1	Pinus hartwegii isolate DONN02 chloroplast, partial genome
JN854205.1	Pinus douglasiana isolate DOUG01 chloroplast, partial genome
JN854203.1	Pinus edulis isolate EDUL08 chloroplast, partial genome
JN854201.1	Pinus engelmannii isolate ENGE02 chloroplast, partial genome
JN854200.1	Pinus fragilissima isolate FRAG01 chloroplast, partial genome
JN854199.1	Pinus glabra isolate GLAB01 chloroplast, partial genome
JN854197.1	Pinus halepensis isolate HALE03 chloroplast, partial genome
JN854196.1	Pinus hartwegii isolate HART07 chloroplast, partial genome
JN854195.1	Pinus heldreichii isolate HELD07 chloroplast, partial genome
JN854194.1	Pinus hwangshanensis isolate HWAN01 chloroplast, partial genome
JN854192.1	Pinus johannis chloroplast, partial genome
JN854191.1	Pinus kesiya isolate KESI11 chloroplast, partial genome
JN854190.1	Pinus latteri isolate LATT02 chloroplast, partial genome
JN854185.1	Pinus massoniana isolate MASS02 chloroplast, partial genome
JN854184.1	Pinus maximartinezii isolate MAXZ01 chloroplast, partial genome
JN854183.1	Pinus montezumae isolate MONZ01 chloroplast, partial genome
JN854182.1	Pinus morrisonicola isolate MORR01 chloroplast, partial genome
JN854181.1	Pinus mugo isolate MUGO01 chloroplast, partial genome
JN854180.1	Pinus muricata isolate MURI01 chloroplast, partial genome
JN854179.1	Pinus nigra isolate NIGR20 chloroplast, partial genome
JN854178.1	Pinus pseudostrobus var. apulcensis isolate OAXA02 chloroplast, partial genome
JN854174.1	Pinus pinceana isolate PINC13 chloroplast, partial genome
JN854173.1	Pinus pinea isolate PINE03 chloroplast, partial genome
JN854172.1	Pinus ponderosa var. benthamiana isolate POND21 chloroplast, partial genome
JN854171.1	Pinus ponderosa var. scopulorum isolate POND59 chloroplast, partial genome
JN854170.1	Pseudotsuga menziesii var. menziesii isolate PSEMEN05 chloroplast, partial genome
JN854168.1	Pinus pumila isolate PUMI07 chloroplast, partial genome
JN854166.1	Pinus quadrifolia isolate QUAD02 chloroplast, partial genome
JN854165.1	Pinus radiata isolate RADI01 chloroplast, partial genome
JN854164.1	Pinus remota isolate REMO05 chloroplast, partial genome
JN854162.1	Pinus roxburghii isolate ROXB04 chloroplast, partial genome
JN854161.1	Pinus sabiniana isolate SABI04 chloroplast, partial genome
JN854159.1	Pinus strobiformis isolate STRF17 chloroplast, partial genome
JN854157.1	Pinus taiwanensis isolate TAIW04 chloroplast, partial genome
JN854156.1	Pinus tropicalis isolate TROP02 chloroplast, partial genome
JN854155.1	Pinus virginiana isolate VIRG01 chloroplast, partial genome
JN854154.1	Pinus wallichiana isolate WALL02 chloroplast, partial genome
JN854153.1	Pinus kwangtungensis isolate WANG05 chloroplast, partial genome
JN854151.1	Pinus yunnanensis isolate YUNN01 chloroplast, partial genome
JN854226.1	Pinus amamiana isolate AMAM05 chloroplast, partial genome
JN854225.1	Pinus arizonica isolate ARIZ01 chloroplast, partial genome
JN854224.1	Pinus brutia isolate BRUT01 chloroplast, partial genome
JN854223.1	Pinus bungeana isolate BUNG05 chloroplast, partial genome
JN854220.1	Pinus cembroides isolate CEMD04 chloroplast, partial genome
JN854219.1	Pinus chiapensis isolate CHIA35 chloroplast, partial genome
JN854218.1	Pinus leiophylla var. chihuahuana isolate CHIH01 chloroplast, partial genome
HQ325741.1	Gossypium darwinii chloroplast, complete genome
AP010819.1	Ephedra equisetina chloroplast DNA, complete sequence
AP009568.1	Welwitschia mirabilis chloroplast DNA, complete genome
AB547400.1	Cathaya argyrophylla chloroplast DNA, complete genome
AB480043.1	Cedrus deodara chloroplast DNA, complete sequence
AB197035.2	Selaginella uncinata chloroplast DNA, complete genome
JF746994.1	Erycina pusilla chloroplast, complete genome
JQ755301.1	Vigna unguiculata chloroplast, complete genome
FJ212316.3	Phoenix dactylifera isolate DP00001 chloroplast, complete genome
JQ228388.1	Theobroma grandiflorum chloroplast, partial genome
AB684440.1	Ginkgo biloba chloroplast DNA, complete genome
JF715057.1	Silene vulgaris chloroplast, complete genome
JF715056.1	Silene noctiflora chloroplast, complete genome
JF715055.1	Silene latifolia chloroplast, complete genome
FJ546412.1	Syntrichia ruralis chloroplast, complete genome
JN563929.1	Nicotiana undulata chloroplast, complete genome
GU228899.2	Olea europaea cultivar Bianchera chloroplast, complete genome
GU811709.2	Phoenix dactylifera chloroplast, complete genome
HM029371.1	Lathyrus sativus cultivar Cicerchia Marchigiana chloroplast, complete genome
GU191334.1	Equisetum arvense chloroplast, complete genome
AY178864.1	Adiantum capillus-veneris chloroplast, complete genome
AM712908.1	Ceratophyllum demersum chloroplast, complete genome
D17510.1	Pinus thunbergii chloroplast DNA, complete genome
AP002983.1	Lotus japonicus chloroplast DNA, complete genome
AM711640.1	Cuscuta reflexa complete chloroplast genome
AP009372.1	Crucihimalaya wallichii chloroplast DNA, complete sequence
AP009367.1	Aethionema grandiflorum chloroplast DNA, complete sequence
AP009123.1	Gossypium barbadense chloroplast DNA, complete genome
AJ506156.2	Amborella trichopoda chloroplast genomic DNA, complete sequence
AJ400848.1	Spinacia oleracea complete chloroplast genome
AP004638.1	Psilotum nudum chloroplast DNA, complete genome
AJ428413.1	Calycanthus fertilis var. ferax complete chloroplast genome
KY434195.1	Dendrosenecio battiscombei chloroplast, complete genome
KY434194.1	Dendrosenecio keniensis chloroplast, complete genome
KY434193.1	Dendrosenecio keniodendron chloroplast, complete genome
MG517444.1	Patrinia saniculifolia voucher NIBR:VP0000642096 chloroplast, complete genome
MG585274.1	Paeonia ostii cultivar Fengdan chloroplast, complete genome
LT558636.1	Brachypodium distachyon chloroplast genome, ecotype BdTR9K
LT558635.1	Brachypodium distachyon chloroplast genome, ecotype BdTR5I
LT558634.1	Brachypodium distachyon chloroplast genome, ecotype BdTR3C
LT558633.1	Brachypodium distachyon chloroplast genome, ecotype Adi10
LT558632.1	Brachypodium distachyon chloroplast genome, ecotype Adi12
LT558631.1	Brachypodium distachyon chloroplast genome, ecotype BdTR13C
LT558630.1	Brachypodium distachyon chloroplast genome, ecotype Uni2
LT558629.1	Brachypodium distachyon chloroplast genome, ecotype Tek2
LT558628.1	Brachypodium distachyon chloroplast genome, ecotype Tek4
LT558627.1	Brachypodium distachyon chloroplast genome, ecotype Sig2
LT558626.1	Brachypodium distachyon chloroplast genome, ecotype S8iiC
LT558625.1	Brachypodium distachyon chloroplast genome, ecotype RON4
LT558624.1	Brachypodium hybridum chloroplast genome, ecotype Pob1
LT558623.1	Brachypodium distachyon chloroplast genome, ecotype Per1
LT558622.1	Brachypodium distachyon chloroplast genome, ecotype Mur1
LT558621.1	Brachypodium distachyon chloroplast genome, ecotype Mon3
LT558620.1	Brachypodium distachyon chloroplast genome, ecotype Mig3
LT558619.1	Brachypodium distachyon chloroplast genome, ecotype Luc1
LT558618.1	Brachypodium distachyon chloroplast genome, ecotype Koz3
LT558617.1	Brachypodium distachyon chloroplast genome, ecotype Koz1
LT558616.1	Brachypodium distachyon chloroplast genome, ecotype Kah5
LT558615.1	Brachypodium distachyon chloroplast genome, ecotype Kah1
LT558614.1	Brachypodium distachyon chloroplast genome, ecotype Jer-1
LT558613.1	Brachypodium distachyon chloroplast genome, ecotype Foz1
LT558612.1	Brachypodium distachyon chloroplast genome, ecotype Bis1
LT558611.1	Brachypodium distachyon chloroplast genome, ecotype BdTR13A
LT558610.1	Brachypodium distachyon chloroplast genome, ecotype BdTR12C
LT558609.1	Brachypodium distachyon chloroplast genome, ecotype BdTR11I
LT558608.1	Brachypodium distachyon chloroplast genome, ecotype BdTR11G
LT558607.1	Brachypodium distachyon chloroplast genome, ecotype BdTR11A
LT558606.1	Brachypodium distachyon chloroplast genome, ecotype BdTR10C
LT558605.1	Brachypodium distachyon chloroplast genome, ecotype BdTR8I
LT558604.1	Brachypodium distachyon chloroplast genome, ecotype BdTR7A
LT558603.1	Brachypodium hybridum chloroplast genome, ecotype BdTR6G
LT558602.1	Brachypodium distachyon chloroplast genome, ecotype BdTR2G
LT558601.1	Brachypodium distachyon chloroplast genome, ecotype BdTR2B
LT558600.1	Brachypodium distachyon chloroplast genome, ecotype BdTR1I
LT558599.1	Brachypodium distachyon chloroplast genome, ecotype Bd30-1
LT558598.1	Brachypodium distachyon chloroplast genome, ecotype Bd29-1
LT558597.1	Brachypodium distachyon chloroplast genome, ecotype Bd21-Control
LT558596.1	Brachypodium distachyon chloroplast genome, ecotype Bd21-3
LT558595.1	Brachypodium distachyon chloroplast genome, ecotype Bd18-1
LT558594.1	Brachypodium distachyon chloroplast genome, ecotype Bd3-1
LT558593.1	Brachypodium distachyon chloroplast genome, ecotype Bd2-3
LT558592.1	Brachypodium distachyon chloroplast genome, ecotype Bd1-1
LT558591.1	Brachypodium distachyon chloroplast genome, ecotype Arn1
LT558590.1	Brachypodium distachyon chloroplast genome, ecotype Adi2
LT558589.1	Brachypodium stacei chloroplast genome, ecotype ABR114
LT558588.1	Brachypodium distachyon chloroplast genome, ecotype ABR8
LT558587.1	Brachypodium distachyon chloroplast genome, ecotype ABR7
LT558586.1	Brachypodium distachyon chloroplast genome, ecotype ABR5
LT558585.1	Brachypodium distachyon chloroplast genome, ecotype ABR4
LT558584.1	Brachypodium distachyon chloroplast genome, ecotype ABR3
LT558583.1	Brachypodium distachyon chloroplast genome, ecotype ABR2
LT558582.1	Brachypodium distachyon chloroplast genome, ecotype Gaz8
LT222230.1	Brachypodium hybridum ecotype ABR113 chloroplast, complete genome
LT222229.1	Brachypodium distachyon ecotype ABR6 chloroplast, complete genome
MF850254.1	Camellia japonica strain S288C chloroplast, complete genome
MF681803.1	UNVERIFIED: Androsace umbellata chloroplast sequence
MF681802.1	UNVERIFIED: Androsace tanggulashanensis chloroplast sequence
MG138151.1	Durio zibethinus chloroplast, complete genome
MG458703.1	Pisum fulvum isolate 706 chloroplast, complete genome
MG458702.1	Pisum fulvum isolate WL2140 chloroplast, complete genome
MF795140.1	Gymnocarpos przewalskii chloroplast, complete genome
MF795085.1	Larix sibirica chloroplast, complete genome
MG182422.1	Nicotiana attenuata chloroplast, complete genome
MG029118.1	Ambrosia trifida chloroplast, complete genome
MG019037.1	Ambrosia artemisiifolia chloroplast, complete genome
MF197310.1	Vanilla pompona chloroplast, complete genome
MF818319.1	Solanum melongena chloroplast, complete genome
MG022623.1	Lagenaria siceraria isolate USVL1VR-Ls chloroplast, complete genome
MG022622.1	Momordica charantia isolate OHB3-1 chloroplast, complete genome
KX342847.1	Sinalliaria limprichtiana var. grandifolia chloroplast, complete genome
KY100266.1	Vachellia tortilis subsp. raddiana isolate Nezmet 23 chloroplast, complete genome
KY100269.1	Senegalia laeta isolate In Zbib 8 chloroplast, complete genome
KY100268.1	Faidherbia albida isolate In Zbib 5 chloroplast, complete genome
KY100267.1	Vachellia seyal isolate Mazoliet 36 chloroplast, complete genome
KY100265.1	Vachellia tortilis subsp. raddiana isolate Nezmet 19 chloroplast, complete genome
KY100264.1	Vachellia nilotica subsp. tomentosa isolate Amzegin 20 chloroplast, complete genome
KY100263.1	Vachellia flava chloroplast, complete genome
KY352315.1	Przewalskia tangutica chloroplast, complete genome
KY312849.1	Carpinus cordata chloroplast, complete genome
KX781246.1	Salix arbutifolia chloroplast, complete genome
KX631429.1	Triticum aestivum subsp. tibeticum chloroplast, complete genome
KY432809.1	Eremochloa ophiuroides voucher ISC<USA-IA_:Clark et al. 1694 chloroplast, complete genome
KY432808.1	Ehrharta bulbosa voucher ISC<USA-IA_:N. Barker 1119 chloroplast, complete genome
KY432807.1	Dactyloctenium aegyptium voucher USDA:PI 271561 chloroplast, complete genome
KY432806.1	Cynosurus cristatus voucher USDA:PI 642807 chloroplast, complete genome
KY432805.1	Chaetium bromoides voucher ISC<USA-IA_:Clark & Lewis 1643 chloroplast, complete genome
KY432804.1	Catapodium rigidum voucher K:MSB 33945 chloroplast, complete genome
KY432803.1	Vaseyochloa multinervosa voucher USDA:PI 216663 chloroplast, complete genome
KY432802.1	Uniola paniculata voucher ISC<USA-IA_:Clark et al. 1702 chloroplast, complete genome
KY432801.1	Tristachya leucothrix voucher DEK:H. Beck 5018 chloroplast, complete genome
KY432800.1	Trichoneura grandiglumis voucher USDA:PI 365064 chloroplast, complete genome
KY432799.1	Tricholaena monachne voucher USDA:PI 166381 chloroplast, complete genome
KY432798.1	Tribolium hispidum voucher USDA:PI 368891 chloroplast, complete genome
KY432797.1	Stipagrostis hirtigluma voucher K:MSB 74902 chloroplast, complete genome
KY432796.1	Stenotaphrum secundatum voucher USDA:PI 410357 chloroplast, complete genome
KY432795.1	Schismus arabicus voucher K:MSB 557283 chloroplast, complete genome
KY432794.1	Sacciolepis indica voucher USDA:PI 338609 chloroplast, complete genome
KY432793.1	Rytidosperma semiannulare voucher USDA:PI 210172 chloroplast, complete genome
KY432792.1	Rhipidocladum pittieri voucher ISC<USA-IA_:Clark & Zhang 1349 chloroplast, complete genome
KY432791.1	Piptatherum songaricum voucher USDA:PI 598562 chloroplast, complete genome
KY432790.1	Phyllorachis sagittata voucher K:M. Voronstova et al. 246 chloroplast, complete genome
KY432789.1	Oropetium aristatum voucher K:MSB 351931 chloroplast, complete genome
KY432788.1	Nassella hyalina voucher USDA:PI 372240 chloroplast, complete genome
KY432787.1	Nardus stricta voucher K:MSB 64428 chloroplast, complete genome
KY432786.1	Melanocenchris abyssinica voucher USDA:PI 213515 chloroplast, complete genome
KY432785.1	Lygeum spartum voucher K:MSB 185109 chloroplast, complete genome
KY432784.1	Leptochloa virgata voucher USDA:PI 337545 chloroplast, complete genome
KY432783.1	Humbertochloa bambusiuscula voucher K:M. Vorontsova et al. 956 chloroplast, complete genome
KY432782.1	Homolepis isocalycia voucher SI:F. Zuloaga 6938 chloroplast, complete genome
KY432781.1	Holcus lanatus voucher USDA:PI 659841 chloroplast, complete genome
KY432780.1	Halopyrum mucronatum voucher K:MSB 109121 chloroplast, complete genome
KY432779.1	Gynerium sagittatum voucher MO:M. Mejia-Saules 15588 chloroplast, complete genome
KY432778.1	Gastridium ventricosum voucher USDA:PI 442495 chloroplast, complete genome
KY432777.1	Eustachys glauca voucher ISC<USA-IA_:Clark et al. 1701 chloroplast, complete genome
KY432812.1	Streptogyna americana voucher US:J. G. Sanchez-Ken:657 chloroplast, complete genome
KY432811.1	Enneapogon oblongus voucher USDA:PI 238297 chloroplast, complete genome
KX622799.1	Saussurea chabyoungsanica chloroplast, complete genome
KT734620.1	Burmannia cryptopetala voucher PDBK 2014-1549 chloroplast, complete genome
KT734619.1	Burmannia disticha voucher PDBK TCA2014-1698 chloroplast, complete genome
KT734618.1	Burmannia coelestis voucher PDBK TCA2009-1384 chloroplast, complete genome
KT719235.1	Tacca leontopetaloides voucher PDBK TA2015-0007 chloroplast, complete genome
KR230392.1	Cucumis sativus var. hardwickii chloroplast, complete genome
MF781071.1	Ziziphus jujuba cultivar Dongzao voucher BZG2016009 chloroplast, complete genome
KY806281.1	Cercis glabra chloroplast, complete genome
KY806280.1	Adenolobus garipensis chloroplast, complete genome
MG661263.1	Erythropalum scandens chloroplast, complete genome
MF136516.1	Alnus subcordata isolate 1978-6188 (K) chloroplast, complete genome
MF136515.1	Alnus rubra isolate 1979-786 (K) chloroplast, complete genome
MF136514.1	Alnus orientalis isolate 1999-3091 (K) chloroplast, complete genome
MF136513.1	Alnus nitida isolate 1998-654 (K) chloroplast, complete genome
MF136512.1	Alnus maximowiczii isolate 1980-2062 (K) chloroplast, complete genome
MF136511.1	Alnus maritima subsp. oklahomensis isolate HC13-1 chloroplast, complete genome
MF136510.1	Alnus maritima subsp. maritima isolate MC13-2 chloroplast, complete genome
MF136509.1	Alnus maritima subsp. maritima isolate MC13-1 chloroplast, complete genome
MF136508.1	Alnus jorullensis subsp. jorullensis isolate 2014-40 (K) chloroplast, complete genome
MF136506.1	Alnus incana isolate CH-07 chloroplast, complete genome
MF136507.1	Alnus japonica isolate 1999-155 (K) chloroplast, complete genome
MF136505.1	Alnus incana isolate BEA-2 chloroplast, complete genome
MF136504.1	Alnus glutinosa subsp. glutinosa isolate 1995-518 (K) chloroplast, complete genome
MF136503.1	Alnus glutinosa subsp. glutinosa isolate SH-9 chloroplast, complete genome
MF136502.1	Alnus glutinosa subsp. glutinosa isolate LF13-1b chloroplast, complete genome
MF136501.1	Alnus glutinosa subsp. barbata isolate 1956-12003 (K) chloroplast, complete genome
MF136500.1	Alnus cordata isolate MC-31 chloroplast, complete genome
MF136499.1	Alnus glutinosa subsp. betuloides isolate 1995-1202 (K) chloroplast, complete genome
MF136498.1	Alnus alnobetula subsp. alnobetula isolate CF09-AV1 chloroplast, complete genome
MF136497.1	Alnus cordata isolate AZ12-2 chloroplast, complete genome
MF136496.1	Alnus alnobetula subsp. suaveolens isolate ESE-17 chloroplast, complete genome
MF136495.1	Alnus alnobetula subsp. crispa isolate TAD-30 chloroplast, complete genome
MF805727.1	UNVERIFIED: Chenopodium quinoa chloroplast sequence
KY379906.1	Panax stipuleanatus chloroplast, complete genome
MG599083.1	Daniellia pilosa voucher FT0692 chloroplast, complete genome
MG599082.1	Crudia harmsiana voucher FT0691 chloroplast, complete genome
MG564755.1	Guibourtia leonensis voucher P:HB6561 chloroplast, complete genome
LC348382.1	Vitis rupestris chloroplast INRA:8068 Mtp2 DNA, complete genome
LC339502.1	Vitis ficifolia chloroplast USDA:NCGR:DVIT 1160 genomic DNA, complete genome
LC337667.1	Vitis cordifolia chloroplast INRA:8029Mtp1 DNA, complete genome
LC333363.1	Vitis coignetiae chloroplast USDA:NCGR:DVIT 1159 DNA, complete genome
MG525005.1	Camptotheca acuminata chloroplast, complete genome
MG525004.1	Cornus controversa chloroplast, complete genome
MG525003.1	Alangium alpinum chloroplast, complete genome
MG525002.1	Davidia involucrata chloroplast, complete genome
MG525001.1	Mastixia caudatilimba chloroplast, complete genome
MG525000.1	Nyssa sinensis chloroplast, complete genome
MG524999.1	Curtisia dentata chloroplast, complete genome
MG524998.1	Cornus capitata chloroplast, complete genome
MG524997.1	Fouquieria diguetii chloroplast, complete genome
MG524996.1	Alangium chinense chloroplast, complete genome
MG524995.1	Nyssa wenshanensis chloroplast, complete genome
MG524994.1	Hydrangea heteromalla chloroplast, complete genome
MG524993.1	Deutzia crassifolia chloroplast, complete genome
MG524992.1	Hydrangea aspera chloroplast, complete genome
MG524991.1	Diplopanax stachyanthus chloroplast, complete genome
MG524990.1	Cornus capitata chloroplast, complete genome
KY993962.1	UNVERIFIED: Landoltia punctata strain ZH0202 isolate ZH0051 chloroplast, complete genome
KY993961.1	UNVERIFIED: Lemna japonica strain 0234 chloroplast sequence
KY993960.1	UNVERIFIED: Landoltia punctata strain 0086 chloroplast sequence
KY993959.1	UNVERIFIED: Landoltia punctata strain 0062 chloroplast sequence
KY993958.1	UNVERIFIED: Wolffia australiana strain 7317 chloroplast sequence
KY993957.1	UNVERIFIED: Lemna gibba strain 9584 chloroplast sequence
KY993956.1	UNVERIFIED: Lemna minor strain 9532 chloroplast sequence
KY993955.1	UNVERIFIED: Lemna japonica strain 8695 chloroplast sequence
LC342076.1	Vitis monticola chloroplast USDA:NCGR:DVIT1847 DNA, complete genome
LC341205.1	Vitis flexuosa chloroplast USDA:NCGR: DVIT 1385 DNA, complete genome
MF521827.1	Actinidia arguta chloroplast, complete genome
MF521826.1	Pyrus hopeiensis chloroplast, complete genome
MF186593.1	Aconitum reclinatum chloroplast, complete genome
LC332844.1	Vitis cinerea chloroplast INRA:8027 Mtp4 DNA, complete genome
KY241814.1	Glycine soja chloroplast, complete genome
KT861471.1	Catha edulis chloroplast, partial genome
MG019415.1	UNVERIFIED: Momordica charantia chloroplast sequence
MF991116.1	Cucurbita moschata chloroplast, complete genome
MF991115.1	Cucurbita maxima chloroplast, complete genome
MF663009.1	Achyrachaena mollis chloroplast, complete genome
KY427336.1	Christella appendiculata chloroplast, complete genome
MG008316.1	Neojobertia candolleana voucher L.G. Lohmann 363 chloroplast, complete genome
MG008315.1	Adenocalymma subspicatum voucher R.G. Udulutsch 2758 chloroplast, complete genome
MG008314.1	Adenocalymma peregrinum voucher L.H.M. Fonseca 444 chloroplast, complete genome
MG008313.1	Adenocalymma pedunculatum voucher L.H.M. Fonseca 267 chloroplast, complete genome
MG008312.1	Adenocalymma hatschbachii voucher L.H.M. Fonseca 262 chloroplast, complete genome
MG008311.1	Adenocalymma cristicalyx voucher L.G. Lohmann 705 chloroplast, complete genome
MG008310.1	Adenocalymma bracteatum voucher L.H.M. Fonseca 100 chloroplast, complete genome
MG008309.1	Adenocalymma biternatum voucher M.R. Pace 521 chloroplast, complete genome
MG008308.1	Adenocalymma aurantiacum voucher L.G. Lohmann 658 chloroplast, complete genome
MG008307.1	Adenocalymma allamandiflorum voucher B.M. Gomes 671 chloroplast, complete genome
MF695711.1	Saussurea polylepis chloroplast, complete genome
MF770705.1	Symplocos ovatilobata chloroplast, complete genome
KY427329.1	Ampelopteris prolifera chloroplast, complete genome
KY120323.1	Coptis chinensis chloroplast, complete genome
KP016927.1	Ilex dumosa voucher Ilex dumosa chloroplast, complete genome
KP016928.1	Ilex paraguariensis voucher Yerba mate chloroplast, complete genome
MF687919.1	Colobanthus apetalus chloroplast, complete genome
MF683841.1	Dasiphora fruticosa voucher JLM20170727 chloroplast, complete genome
KT726909.1	Neofinetia falcata voucher PDBK 2014-0944 chloroplast, complete genome
KT726908.1	Neofinetia richardsiana voucher PDBK 2014-0945 chloroplast, complete genome
KT726907.1	Neofinetia falcata cultivar CheongSan voucher PDBK 2014-0010 chloroplast, complete genome
MF480544.1	UNVERIFIED: Primulina juliae isolate 7 voucher CZYX03 chloroplast sequence
MF480543.1	UNVERIFIED: Primulina juliae isolate 6 voucher CZYX03 chloroplast sequence
MF480542.1	UNVERIFIED: Primulina juliae isolate 5 voucher CZYX03 chloroplast sequence
MF480541.1	UNVERIFIED: Primulina juliae isolate 4 voucher CZYX03 chloroplast sequence
MF480540.1	UNVERIFIED: Primulina juliae isolate 3 voucher CZYX03 chloroplast sequence
MF480539.1	UNVERIFIED: Primulina juliae isolate 2 voucher CZYX03 chloroplast sequence
MF480538.1	UNVERIFIED: Primulina juliae isolate 1 voucher CZYX03 chloroplast sequence
MF480537.1	UNVERIFIED: Primulina sp. 'yongxingensis' isolate 7 voucher CZYX02 chloroplast sequence
MF480536.1	UNVERIFIED: Primulina sp. 'yongxingensis' isolate 6 voucher CZYX02 chloroplast sequence
MF480535.1	UNVERIFIED: Primulina sp. 'yongxingensis' isolate 5 voucher CZYX02 chloroplast sequence
MF480534.1	UNVERIFIED: Primulina sp. 'yongxingensis' isolate 4 voucher CZYX02 chloroplast sequence
MF480533.1	UNVERIFIED: Primulina sp. 'yongxingensis' isolate 3 voucher CZYX02 chloroplast sequence
MF480532.1	UNVERIFIED: Primulina sp. 'yongxingensis' isolate 2 voucher CZYX02 chloroplast sequence
MF480531.1	UNVERIFIED: Primulina sp. 'yongxingensis' isolate 1 voucher CZYX02 chloroplast sequence
MF480530.1	UNVERIFIED: Primulina eburnea isolate 7 voucher CZYX01 chloroplast sequence
MF480529.1	UNVERIFIED: Primulina eburnea isolate 6 voucher CZYX01 chloroplast sequence
MF480528.1	UNVERIFIED: Primulina eburnea isolate 5 voucher CZYX01 chloroplast sequence
MF480527.1	UNVERIFIED: Primulina eburnea isolate 4 voucher CZYX01 chloroplast sequence
MF480526.1	UNVERIFIED: Primulina eburnea isolate 3 voucher CZYX01 chloroplast sequence
MF480525.1	UNVERIFIED: Primulina eburnea isolate 2 voucher CZYX01 chloroplast sequence
MF480524.1	UNVERIFIED: Primulina eburnea isolate 1 voucher CZYX01 chloroplast sequence
MF472013.1	Primulina linearifolia chloroplast, complete genome
MF472012.1	Primulina huaijiensis chloroplast, complete genome
MF472011.1	Primulina eburnea chloroplast, complete genome
MF359958.1	Eschweilera micrantha chloroplast, partial genome
MF359957.1	Eschweilera caudiculata chloroplast, partial genome
MF359956.1	Barringtonia edulis chloroplast, partial genome
MF359955.1	Corythophora amapaensis chloroplast, partial genome
MF359954.1	Eschweilera pittieri chloroplast, partial genome
MF359953.1	Lecythis pneumatophora chloroplast, partial genome
MF359952.1	Grias cauliflora chloroplast, partial genome
MF359951.1	Lecythis ampla chloroplast, partial genome
MF359950.1	Lecythis corrugata chloroplast, partial genome
MF359949.1	Allantoma decandra chloroplast, partial genome
MF359948.1	Bertholletia excelsa voucher NY:Mori25637 chloroplast, complete genome
MF359947.1	Gustavia serrata chloroplast, partial genome
MF359946.1	Corythophora labriculata chloroplast, partial genome
MF359945.1	Lecythis minor chloroplast, partial genome
MF359944.1	Couratari macrosperma chloroplast, partial genome
MF359943.1	Gustavia augusta chloroplast, partial genome
MF359942.1	Eschweilera integrifolia chloroplast, partial genome
MF359941.1	Allantoma lineata chloroplast, partial genome
MF359940.1	Eschweilera alata chloroplast, partial genome
MF359939.1	Eschweilera wachenheimii chloroplast, partial genome
MF359938.1	Cariniana estrellensis chloroplast, partial genome
MF359937.1	Eschweilera congestiflora chloroplast, partial genome
MF359936.1	Couratari stellata chloroplast, partial genome
MF359935.1	Couroupita guianensis chloroplast, partial genome
KY609860.1	Huperzia serrata f. longipetiolata chloroplast, complete genome
KF922718.1	Neobartsia inaequalis chloroplast, partial genome
MF401453.1	Oryza meyeriana chloroplast, complete genome
MF401452.1	Oryza rhizomatis chloroplast, complete genome
MF401451.1	Oryza latifolia chloroplast, complete genome
MF401450.1	Oryza eichingeri chloroplast, complete genome
MF621982.1	Firmiana pulcherrima chloroplast, complete genome
MF623173.1	Artemisia annua chloroplast, complete genome
KY427355.1	Pseudophegopteris aurita chloroplast, complete genome
MF594682.1	Cenchrus purpureus chloroplast, complete genome
MF135621.1	Quercus tarokoensis chloroplast, complete genome
MF062434.1	Malus micromalus chloroplast, complete genome
KX871231.1	Mangifera indica voucher PDBK 2014-0249 chloroplast, complete genome
KX822787.1	Garcinia mangostana voucher PDBK 2014-0243 chloroplast, complete genome
MF579702.1	Forsythia suspensa chloroplast, complete genome
KY849971.1	Linum usitatissimum chloroplast, complete genome
KX364403.1	Psidium guajava chloroplast, complete genome
KX364402.1	Carissa macrocarpa chloroplast, complete genome
KX364202.1	Averrhoa carambola voucher PDBK 2014-0241 chloroplast, complete genome
MF155666.1	Aconitum sinomontanum chloroplast, complete genome
MF155665.1	Aconitum finetianum chloroplast, complete genome
MF155664.1	Aconitum angustius chloroplast, complete genome
MF614917.1	Littledalea racemosa voucher L122 chloroplast, complete genome
MF621620.1	Plagiobothrys nothofulvus chloroplast, partial genome
LC317045.1	Dendrobium devonianum chloroplast DNA, complete genome
LC317044.1	Dendrobium loddigesii chloroplast DNA, complete genome
CM008430.1	Chenopodium quinoa cultivar Real Blanca chloroplast, complete sequence, whole genome shotgun sequence
KY235373.1	Cortusa matthioli subsp. pekinensis chloroplast, complete genome
KY849819.1	Pleione bulbocodioides chloroplast, complete genome
LC199503.1	Neuwiedia zollingeri var. singapureana chloroplast DNA, complete genome
LC199394.1	Apostasia wallichii chloroplast DNA, complete genome
AP017911.1	Aphananthe aspera chloroplast DNA, nearly complete sequence
AP017910.1	Patrinia triloba var. takeuchiana chloroplast DNA, nearly complete sequence
AP017909.1	Rumex nepalensis chloroplast DNA, nearly complete sequence
AP017908.1	Asarum sakawanum chloroplast DNA, nearly complete sequence
AP017907.1	Tricyrtis macropoda chloroplast DNA, nearly complete sequence
AP017906.1	Aphananthe aspera chloroplast DNA, nearly complete sequence
AP017905.1	Zelkova serrata chloroplast DNA, nearly complete sequence
AP017904.1	Callitris sulcata chloroplast DNA, nearly complete sequence
AJ271079.4	Oenothera elata subsp. hookeri strain johansen Standard chloroplast, complete genome
EU262889.2	Oenothera biennis chloroplast, complete genome
KY587457.1	Codonopsis minima chloroplast, complete genome
KY872756.1	Styphnolobium japonicum f. violaceum chloroplast, complete genome
KY073391.1	Artemisia capillaris voucher Artemisia capillairs chloroplast, complete genome
KY073390.1	Artemisia gmelinii chloroplast, complete genome
KY996493.1	Taxillus sutchuenensis chloroplast, complete genome
KY996492.1	Taxillus chinensis chloroplast, complete genome
MF574684.1	Iodes cirrhosa chloroplast, complete genome
KY273445.1	Emmenopterys henryi voucher XGS20161127 chloroplast, complete genome
KY490694.1	Portulaca oleracea chloroplast, complete genome
KX462131.1	Adenophora stricta chloroplast, complete genome
KX462130.1	Adenophora erecta chloroplast, complete genome
KX462129.1	Adenophora divaricata chloroplast, complete genome
MF594405.1	Angelica nitida chloroplast, complete genome
MF177095.1	Salvinia cucullata voucher C.-W. Chen s.n. (TAIF) chloroplast, complete genome
MF177094.1	Azolla filiculoides voucher Schlupmann s.n. (DUKE) chloroplast, complete genome
MF177093.1	Azolla caroliniana isolate 145 voucher 3004 chloroplast, complete genome
MF177092.1	Azolla caroliniana isolate 140 voucher 3017 chloroplast, complete genome
MF177091.1	Azolla rubra chloroplast, complete genome
MF177090.1	Azolla nilotica chloroplast, complete genome
MF177089.1	Azolla microphylla chloroplast, complete genome
MF177088.1	Azolla mexicana chloroplast, complete genome
MF668133.1	Dalbergia odorifera isolate Y801 chloroplast, complete genome
MF449303.1	Salweenia bouffordiana chloroplast, complete genome
MF471373.1	Solanum stoloniferum isolate SS16 chloroplast, complete genome
MF471372.1	Solanum hougasii isolate SH2-10 chloroplast, complete genome
MF471371.1	Solanum chacoense isolate SC3-12 chloroplast, complete genome
MF939351.1	UNVERIFIED: Eusideroxylon zwageri chloroplast sequence
MF939350.1	UNVERIFIED: Cryptocarya hainanensis chloroplast sequence
MF939349.1	UNVERIFIED: Cryptocarya chinensis chloroplast sequence
MF939348.1	UNVERIFIED: Beilschmiedia tungfangensis chloroplast sequence
MF939347.1	UNVERIFIED: Beilschmiedia pauciflora chloroplast sequence
MF939346.1	UNVERIFIED: Caryodaphnopsis henryi chloroplast sequence
MF939345.1	UNVERIFIED: Neocinnamomum lecomtei chloroplast sequence
MF939344.1	UNVERIFIED: Neocinnamomum caudatum chloroplast sequence
MF939343.1	UNVERIFIED: Caryodaphnopsis malipoensis chloroplast sequence
MF939342.1	UNVERIFIED: Actinodaphne trichocarpa chloroplast sequence
MF939341.1	UNVERIFIED: Neolitsea sericea chloroplast sequence
MF939340.1	UNVERIFIED: Nectandra angustifolia chloroplast sequence
MF939339.1	UNVERIFIED: Sassafras tzumu chloroplast sequence
MF939338.1	UNVERIFIED: Cassytha capillaris chloroplast sequence
MF939337.1	UNVERIFIED: Cassytha filiformis chloroplast sequence
MF034027.1	UNVERIFIED: Chrysanthemum zawadskii subsp. coreanum chloroplast sequence
MF034026.1	UNVERIFIED: Chrysanthemum zawadskii var. latilobum chloroplast sequence
MF034025.1	UNVERIFIED: Cirsium japonicum var. spinosissimum chloroplast sequence
MF034024.1	UNVERIFIED: Cirsium japonicum var. maackii chloroplast sequence
MF034023.1	UNVERIFIED: Artemisia montana chloroplast sequence
MF034022.1	UNVERIFIED: Artemisia argyrophylla chloroplast sequence
MF034021.1	UNVERIFIED: Artemisia princeps chloroplast sequence
MF034020.1	UNVERIFIED: Atractylodes macrocephala chloroplast sequence
MF480753.1	Nassella hyalina chloroplast, complete genome
MF480752.1	Nassella neesiana chloroplast, complete genome
KY126307.1	Agropyron cristatum PI598628 complete plastid genome
MF377623.1	Panax vietnamensis chloroplast, complete genome
MF377622.1	Panax stipuleanatus chloroplast, complete genome
MF377621.1	Panax sp. VM-2017 isolate 38 chloroplast, complete genome
MF377620.1	Panax japonicus var. bipinnatifidus chloroplast, complete genome
MF421552.1	Cymbidium goeringii chloroplast, complete genome
MF405340.1	Cardamine macrophylla chloroplast, complete genome
MF374688.1	Liparis loeselii voucher POZ Maslak LS33 chloroplast, complete genome
KY358226.1	Fragaria x ananassa cultivar Benihoppe chloroplast, complete genome
LC228572.1	Larix gmelinii var. japonica chloroplast DNA, complete genome, strain: LgKa01
LC228571.1	Larix gmelinii var. japonica chloroplast DNA, complete genome, strain: LgCh02
LC228570.1	Larix gmelinii var. japonica chloroplast DNA, complete genome, strain: LgCh01
MG025951.1	UNVERIFIED: Curcuma longa chloroplast sequence
KR872391.2	Epipremnum aureum chloroplast, complete genome
MF539928.1	Aristolochia debilis chloroplast, complete genome
MF539927.1	Aristolochia contorta chloroplast, complete genome
MF286764.1	Lessertia frutescens chloroplast, complete genome
MF315089.1	Phoebe zhennan chloroplast, complete genome
MF315088.1	Phoebe bournei voucher PBOUR20170323 chloroplast, complete genome
MF152732.1	Gynostemma pubescens chloroplast, complete genome
MF152731.1	Gynostemma 'burmanicum' chloroplast, complete genome
MF152730.1	Gynostemma longipes chloroplast, complete genome
KY670737.1	Gynostemma pentagynum chloroplast, complete genome
MF136487.1	Gynostemma caulopterum chloroplast, complete genome
MF136486.1	Gynostemma laxiflorum chloroplast, complete genome
MF374324.1	Prunus serotina chloroplast, complete genome
KY769273.1	Colocasia esculenta chloroplast, complete genome
MF176947.1	Phoenix dactylifera voucher SUPG02 chloroplast, complete genome
MF964221.1	Steinchisma laxum voucher GB20-2012 chloroplast, complete genome
MF563384.1	Aristida rufescens voucher K:MSV330 chloroplast, complete genome
MF563383.1	Axonopus ramosus voucher P:GB03-2012 chloroplast, complete genome
MF563382.1	Coelachne africana voucher K:RCH09 chloroplast, complete genome
MF563381.1	Echinochloa stagnina voucher K:RCH49 chloroplast, complete genome
MF563380.1	Echinochloa ugandensis voucher K:MSV706 chloroplast, complete genome
MF563379.1	Entolasia imbricata isolate ARS-GRIN PI 381340 chloroplast, complete genome
MF563378.1	Homolepis aturensis voucher P:GB06-2012 chloroplast, complete genome
MF563377.1	Hildaea pallens voucher GB06-2014 chloroplast, complete genome
MF563376.1	Lasiacis nigra voucher GB02-2014 chloroplast, complete genome
MF563375.1	Merxmuellera tsaratananensis voucher L:MSV486 chloroplast, complete genome
MF563374.1	Panicum lycopodioides voucher GB04-2013 chloroplast, complete genome
MF563373.1	Panicum pygmaeum isolate AWECm chloroplast, complete genome
MF563372.1	Pseudolasiacis leptolomoides voucher K:MSV983 chloroplast, complete genome
MF563371.1	Saccharum hildebrandtii voucher TAN:LRK2008 chloroplast, complete genome
MF563370.1	Sartidia isaloensis voucher K:MSV1325 chloroplast, complete genome
MF563369.1	Streptostachys asperifolia voucher P:GB01-2012 chloroplast, complete genome
MF563368.1	Tristachya humbertii voucher K:MSV1369 chloroplast, complete genome
MF563367.1	Paspalum paniculatum voucher K:MSV500 chloroplast, complete genome
MF563366.1	Loudetia simplex voucher K:MSV1049 chloroplast, complete genome
MF563365.1	Stipagrostis hirtigluma voucher K:MSV902 chloroplast, complete genome
MF193597.1	Tibetia liangshanensis voucher Liuj153027 chloroplast, complete genome
LC325203.1	Vitis x champinii chloroplast INRA:8022 Mtp1 DNA, complete genome
LC322424.1	Vitis mustangensis chloroplast INRA:8020 Mtp1 DNA, complete genome
LC320670.1	Vitis cinerea var. helleri chloroplast INRA:8011 Mtp12 DNA, complete genome
LC318487.1	Vitis amurensis chloroplast USDA:NCGR:DVIT 2006 DNA, complete genome
LC318124.1	Vitis aestivalis chloroplast INRA:8001 Mtp2 DNA, complete genome
LC317004.1	Vitis acerifolia chloroplast USDA:NCGR:DVIT 1298 DNA, complete genome
LN896360.1	Saccharum spontaneum cultivar SES205A chloroplast DNA, complete genome
LN896359.1	Saccharum hybrid cultivar Q165 chloroplast DNA, complete genome
MF156140.1	Sophora alopecuroides chloroplast, complete genome
MF170217.1	Schizachyrium scoparium chloroplast, complete genome
MF177039.1	Primulina liboensis voucher CLIB14R20170516 chloroplast, complete genome
MF177038.1	Chirita eburnea voucher CEBURN20170516 chloroplast, complete genome
MF177037.1	Chirita brachytricha var. magnibracteata voucher CBRAM20170516 chloroplast, complete genome
MF155892.1	Dodonaea viscosa chloroplast, complete genome
MF687003.1	Sinowilsonia henryi chloroplast, complete genome
LN877379.1	Bunias orientalis chloroplast genome, complete sequence, specimen voucher T4-17
LN877378.1	Bunias orientalis chloroplast genome, complete sequence, specimen voucher RO12
LN877377.1	Bunias erucago chloroplast genome, complete sequence, specimen voucher OSBU:12478
LN877376.1	Bunias orientalis chloroplast genome, complete sequence, specimen voucher OS09
KY412195.1	Bergenia scopulosa chloroplast, complete genome
MF100928.1	Sophora alopecuroides chloroplast, complete genome
KY197962.1	Camptotheca acuminata chloroplast, complete genome
KU238086.1	Carex neurocarpa voucher PDBK 2014-0675 chloroplast, complete genome
KU207098.1	Hypolytrum nemorum chloroplast, complete genome
MF663760.1	Tigridiopalma magnifica chloroplast, complete genome
KY511610.1	Euonymus schensianus chloroplast, complete genome
MF663725.1	Bupleurum boissieuanum chloroplast, complete genome
MF370229.1	Zostera marina chloroplast, complete genome
KY751712.1	Pedicularis cheilanthifolia chloroplast, complete genome
KY977990.1	UNVERIFIED: Atractylodes lancea chloroplast sequence
KX822778.1	Milla biflora voucher K:2000-242 chloroplast, complete genome
KX822777.1	Hosta minor voucher K:SSK01 chloroplast, complete genome
KX822776.1	Cordyline indivisa voucher K:20071291 chloroplast, complete genome
KX822775.1	Barnardia japonica voucher K:Hana140807-3 chloroplast, complete genome
KX822774.1	Xanthorrhoea preissii voucher K:20005062 chloroplast, complete genome
KX822773.1	Polygonatum stenophyllum voucher K:Hana140625-2 chloroplast, complete genome
MF167465.1	Juglans sigillata chloroplast, complete genome
MF167464.1	Juglans regia chloroplast, complete genome
MF167463.1	Juglans regia chloroplast, complete genome
MF167462.1	Juglans nigra chloroplast, complete genome
MF167461.1	Juglans mandshurica chloroplast, complete genome
MF167460.1	Juglans major chloroplast, complete genome
MF167459.1	Juglans hindsii chloroplast, complete genome
MF167458.1	Juglans cinerea chloroplast, complete genome
MF167457.1	Juglans cathayensis chloroplast, complete genome
KY940847.1	Lilium philadelphicum chloroplast, complete genome
KY940846.1	Lilium callosum chloroplast, complete genome
KY940845.1	Lilium amabile chloroplast, complete genome
KY940844.1	Lilium lancifolium chloroplast, complete genome
KX790364.1	Anthericum ramosum voucher K:19866218 chloroplast, complete genome
KX790363.1	Agapanthus coddii voucher K:20081397 chloroplast, complete genome
KX790362.1	Maianthemum bicolor voucher K:Hana140621-1 chloroplast, complete genome
KX790361.1	Asparagus schoberioides voucher K:Hana141018-1 chloroplast, complete genome
KX790360.1	Aphyllanthes monspeliensis voucher K:2001826 chloroplast, complete genome
LC228240.1	Cinnamomum camphora chloroplast DNA, complete genome
LC213014.1	Neocinnamomum delavayi chloroplast DNA, complete genome
LC212965.1	Cryptocarya chinensis chloroplast DNA, complete genome
LC210517.1	Cassytha filiformis chloroplast DNA, complete genome
KY951993.1	Actinidia kolomikta chloroplast, complete genome
MF536709.1	Cucumis sativus var. hardwickii isolate PI 183967 chloroplast, complete genome
MF536708.1	Cucumis melo var. flexuosus isolate X091 chloroplast, complete genome
MF536707.1	Cucumis melo var. flexuosus isolate PI 525133 chloroplast, complete genome
MF536706.1	Cucumis melo var. cantalupo isolate X021 chloroplast, complete genome
MF536705.1	Cucumis melo var. inodorus isolate T111 chloroplast, complete genome
MF536704.1	Cucumis melo var. cantalupo isolate Vedrantais chloroplast, complete genome
MF536703.1	Cucumis melo var. cantalupo isolate TopMark chloroplast, complete genome
MF536702.1	Cucumis melo var. dudaim isolate C-1012 chloroplast, complete genome
MF536701.1	Cucumis melo var. momordica isolate MR-1 chloroplast, complete genome
MF536700.1	Cucumis melo var. makuwa isolate M1-15 chloroplast, complete genome
MF536699.1	Cucumis melo var. conomon isolate PI161375 chloroplast, complete genome
MF536698.1	Cucumis melo subsp. agrestis isolate PI614410 chloroplast, complete genome
MF536697.1	Cucumis melo subsp. agrestis isolate PI 614440 chloroplast, complete genome
MF536696.1	Cucumis melo subsp. agrestis isolate C-836 chloroplast, complete genome
MF536695.1	Citrullus rehmii isolate PI 632755 chloroplast, complete genome
MF536694.1	Citrullus amarus isolate Grif16135 chloroplast, complete genome
KY828469.1	Spondias mombin chloroplast, complete genome
KX681673.1	UNVERIFIED: Brassica carinata voucher IT135246 chloroplast sequence
KX681672.1	UNVERIFIED: Brassica carinata voucher IT135088 chloroplast sequence
KX681671.1	UNVERIFIED: Brassica carinata voucher IT119514 chloroplast sequence
KX681670.1	UNVERIFIED: Brassica carinata voucher IT119511 chloroplast sequence
KX681669.1	UNVERIFIED: Brassica napus var. napus voucher IT134604 chloroplast sequence
KX681668.1	UNVERIFIED: Brassica napus var. napus voucher IT134599 chloroplast sequence
KX681667.1	UNVERIFIED: Brassica napus var. napus voucher IT134598 chloroplast sequence
KX681666.1	UNVERIFIED: Brassica napus voucher IT135171 chloroplast sequence
KX681665.1	UNVERIFIED: Brassica juncea subsp. integrifolia voucher K201580 chloroplast sequence
KX681664.1	UNVERIFIED: Brassica juncea voucher K139720 chloroplast sequence
KX681663.1	UNVERIFIED: Brassica juncea subsp. integrifolia voucher K201621 chloroplast sequence
KX681662.1	UNVERIFIED: Brassica juncea subsp. integrifolia voucher K128855 chloroplast sequence
KX681661.1	UNVERIFIED: Raphanus sativus var. sativus voucher K012402 chloroplast sequence
KX681660.1	UNVERIFIED: Raphanus sativus var. sativus voucher IT100594 chloroplast sequence
KX681659.1	UNVERIFIED: Raphanus sativus var. raphanistroides voucher K036707 chloroplast sequence
KX681658.1	UNVERIFIED: Raphanus raphanistrum subsp. landra voucher K046542 chloroplast sequence
KX681657.1	UNVERIFIED: Brassica oleracea var. italica voucher H43 chloroplast sequence
KX681656.1	UNVERIFIED: Brassica oleracea var. gongylodes voucher H20 chloroplast sequence
KX681655.1	UNVERIFIED: Brassica oleracea var. botrytis voucher H17 chloroplast sequence
KX681654.1	UNVERIFIED: Brassica oleracea var. capitata voucher H1 chloroplast sequence
KX681653.1	UNVERIFIED: Brassica nigra voucher IT135242 chloroplast sequence
KX681652.1	UNVERIFIED: Brassica nigra voucher IT135140 chloroplast sequence
KX681651.1	UNVERIFIED: Brassica nigra voucher IT119404 chloroplast sequence
KX681650.1	UNVERIFIED: Brassica rapa subsp. rapa voucher IT137572 chloroplast sequence
KX681649.1	UNVERIFIED: Brassica rapa subsp. pekinensis voucher K128851 chloroplast sequence
KX681648.1	UNVERIFIED: Brassica rapa subsp. chinensis voucher K201443 chloroplast sequence
KX681647.1	UNVERIFIED: Brassica rapa voucher K194441 chloroplast sequence
KX852299.1	Gynostemma cardiospermum chloroplast, complete genome
KX852298.1	Gynostemma pentaphyllum chloroplast, complete genome
KU234277.2	Nymphaea alba voucher Borsch Iseosee NY592 chloroplast, complete genome
KU189255.2	Nymphaea ampla voucher B100458799 chloroplast, complete genome
KT749898.2	Nymphaea jamesoniana chloroplast, complete genome
KY965816.2	Lasthenia californica chloroplast, partial genome
MF583748.1	Magnolia laevifolia chloroplast, complete genome
MF583747.1	Aesculus wangii chloroplast, complete genome
KX437773.1	Phoebe sheareri voucher SY02201 chloroplast, complete genome
KX437771.1	Persea americana voucher SY01359 chloroplast, complete genome
KT348517.1	Machilus balansae voucher SY31724 chloroplast, complete genome
KT348516.1	Machilus yunnanensis voucher SY00401 chloroplast, complete genome
KY284156.2	Barclaya longifolia isolate NY665 chloroplast, complete genome
MF188124.1	Lindera glauca chloroplast, complete genome
KY991380.1	Daphne kiusiana chloroplast, complete genome
MF577082.1	Nicotiana attenuata chloroplast, complete genome
KT705316.2	Brasenia schreberi chloroplast, complete genome
KT705317.2	Cabomba caroliniana isolate NY112 chloroplast, complete genome
KY001813.2	Victoria cruziana isolate NY316 voucher BONN:C. Loehne 55 chloroplast, complete genome
KY200671.1	Decaisnea insignis chloroplast, complete genome
KY407562.1	Aconitum pseudolaeve chloroplast, complete genome
KY407561.1	Aconitum longecassidatum chloroplast, complete genome
KY407560.1	Aconitum carmichaelii chloroplast, complete genome
KY407559.1	Aconitum austrokoreense chloroplast, complete genome
KY610124.1	Chrysopogon zizanioides isolate PI 196257 chloroplast, complete genome
KY610123.1	Chrysopogon zizanioides cultivar Sunshine chloroplast, complete genome
KT347148.1	Welwitschia mirabilis plastid, complete genome
KP099648.1	Ginkgo biloba plastid, complete genome
KY985237.1	Alpinia oxyphylla chloroplast, complete genome
MF621234.1	Prunus cerasoides chloroplast, complete genome
MF156716.1	Cinnamomum camphora chloroplast, complete genome
MF405921.1	Prunus humilis chloroplast, complete genome
MF140336.1	UNVERIFIED: Saccharum officinarum clone 82-72 chloroplast sequence
MF490441.1	Echinacanthus lofouensis chloroplast, complete genome
MF276802.1	Conyza bonariensis chloroplast, complete genome
MF362689.1	Ambrosia artemisiifolia chloroplast, complete genome
KY908401.1	Kingdonia uniflora chloroplast, complete genome
KY908400.1	Circaeaster agrestis chloroplast, complete genome
KY427359.1	Woodsia polystichoides chloroplast, complete genome
KY427358.1	Woodsia macrochlaena chloroplast, complete genome
KY427357.1	Stegnogramma sagittifolia chloroplast, complete genome
KY427356.1	Rhachidosorus consimilis chloroplast, complete genome
KY427354.1	Onoclea sensibilis chloroplast, complete genome
KY427353.1	Matteuccia struthiopteris chloroplast, complete genome
KY427352.1	Macrothelypteris torresiana chloroplast, complete genome
KY427351.1	Hypodematium crenatum chloroplast, complete genome
KY427350.1	Hymenasplenium unilaterale chloroplast, complete genome
KY427349.1	Homalosorus pycnocarpos chloroplast, complete genome
KY427348.1	Dryopteris decipiens chloroplast, complete genome
KY427347.1	Diplazium unilobum chloroplast, complete genome
KY427346.1	Diplazium striatum chloroplast, complete genome
KY427345.1	Diplazium dushanense chloroplast, complete genome
KY427344.1	Diplazium dilatatum chloroplast, complete genome
KY427343.1	Diplazium bellum chloroplast, complete genome
KY427342.1	Diplaziopsis javanica chloroplast, complete genome
KY427341.1	Diplaziopsis cavaleriana chloroplast, complete genome
KY427340.1	Deparia viridifrons chloroplast, complete genome
KY427339.1	Deparia pycnosora chloroplast, complete genome
KY427338.1	Deparia lancea chloroplast, complete genome
KY427337.1	Cystopteris chinensis chloroplast, complete genome
KY427335.1	Athyrium opacum chloroplast, complete genome
KY427334.1	Austroblechnum melanocaulon chloroplast, complete genome
KY427333.1	Athyrium sinense chloroplast, complete genome
KY427332.1	Asplenium prolongatum chloroplast, complete genome
KY427331.1	Asplenium pekinense chloroplast, complete genome
KY427330.1	Athyrium sheareri chloroplast, complete genome
KX871237.1	Habenaria radiata voucher PDBK2015-1271 chloroplast, complete genome
KX871236.1	Gastrochilus japonicus voucher PDBK2015-1266 chloroplast, complete genome
KX871235.1	Oberonia japonica voucher PDBK2015-1269 chloroplast, complete genome
KX871234.1	Thrixspermum japonicum voucher PDBK2015-1270 chloroplast, complete genome
KX871233.1	Gastrochilus fuscopunctatus voucher PDBK2015-1265 chloroplast, complete genome
KX871232.1	Pelatantheria scolopendrifolia voucher PDBK2015-1268 chloroplast, complete genome
KX258661.1	Schizaea pectinata voucher Brande 245 (NY) chloroplast, complete genome
KX258660.1	Schizaea elegans voucher UPCB:Labiak 5550 chloroplast, complete genome
KT833081.1	Cinnamomum micranthum chloroplast, complete genome
KY204085.1	UNVERIFIED: Michelia alba chloroplast, partial genome
LC193523.1	Dendrobium fanjingshanense chloroplast DNA, complete genome
LC193522.1	Dendrobium exile chloroplast DNA, complete genome
LC193521.1	Dendrobium fimbriatum chloroplast DNA, complete genome
LC193520.1	Dendrobium xichouense chloroplast DNA, complete genome
LC193519.1	Dendrobium ellipsophyllum chloroplast DNA, complete genome
LC193518.1	Dendrobium parishii chloroplast DNA, complete genome
LC193517.1	Dendrobium chrysotoxum chloroplast DNA, complete genome
LC193516.1	Dendrobium lohohense chloroplast DNA, complete genome
LC193515.1	Dendrobium jenkinsii chloroplast DNA, complete genome
LC193514.1	Dendrobium chrysanthum chloroplast DNA, complete genome
LC193513.1	Dendrobium henryi chloroplast DNA, complete genome
LC193512.1	Dendrobium parciflorum chloroplast DNA, complete genome
LC193511.1	Dendrobium spatella chloroplast DNA, complete genome
LC193510.1	Dendrobium salaccense chloroplast DNA, complete genome
LC193509.1	Dendrobium crepidatum chloroplast DNA, complete genome
LC193508.1	Dendrobium wilsonii chloroplast DNA, complete genome
LC192961.1	Dendrobium wardianum chloroplast DNA, complete genome
LC192959.1	Dendrobium hercoglossum chloroplast DNA, complete genome
LC192958.1	Dendrobium gratiosissimum chloroplast DNA, complete genome
LC192957.1	Dendrobium falconeri chloroplast DNA, complete genome
LC192956.1	Dendrobium devonianum chloroplast DNA, complete genome
LC192955.1	Dendrobium denneanum chloroplast DNA, complete genome
LC192954.1	Dendrobium brymerianum chloroplast DNA, complete genome
LC192953.1	Dendrobium aphyllum chloroplast DNA, complete genome
KX499864.1	Malus tschonoskii isolate 262 chloroplast, complete genome
KX499863.1	Malus tschonoskii isolate 254 chloroplast, complete genome
KX499862.1	Malus florentina chloroplast, complete genome
KX499858.1	Malus trilobata chloroplast, complete genome
KX499856.1	Malus florentina chloroplast, complete genome
KX352464.1	Platycodon grandiflorus chloroplast, complete genome
MF370556.1	Hydrangea luteovenosa chloroplast, complete genome
KY873324.1	Barthea barthei chloroplast, complete genome
KY921716.1	Magnolia insignis chloroplast, complete genome
KY818915.1	UNVERIFIED: Malus domestica chloroplast sequence
MF189169.1	Salix tetrasperma chloroplast, complete genome
MF189168.1	Salix oreinoma chloroplast, complete genome
MF189167.1	Salix babylonica chloroplast, complete genome
KY931669.1	Trema tomentosa isolate TtoWU10x00 chloroplast, partial genome
KY931668.1	Trema orientalis isolate TorRG33x02 chloroplast, partial genome
KY931667.1	Trema orientalis isolate TorRG16x01 chloroplast, partial genome
KY931666.1	Trema levigata isolate TleWU50x00 chloroplast, partial genome
KY931665.1	Parasponia rugosa isolate PruLW88x56 chloroplast, partial genome
KY931664.1	Parasponia rigida isolate PriWU20x00 chloroplast, partial genome
KY931663.1	Parasponia andersonii isolate PanWU01x14 chloroplast, partial genome
KY931662.1	Gironniera celtidifolia isolate GceSAJ1042 chloroplast, partial genome
KY931661.1	Chaetachme aristata isolate CarGP14423 chloroplast, partial genome
KY887589.1	Solanum pennellii chloroplast, complete genome
KY887588.1	Solanum lycopersicum chloroplast, complete genome
KY887587.1	Solanum lycopersicum chloroplast, complete genome
LN869230.1	Miscanthus x giganteus complete chloroplast genome
LN869229.1	Miscanthus transmorrisonensis complete chloroplast genome
LN869228.1	Miscanthus sinensis subsp. sinensis complete chloroplast genome, cultivar Zebrinus
LN869227.1	Miscanthus sinensis subsp. sinensis complete chloroplast genome, cultivar Strictus
LN869226.1	Miscanthus sinensis subsp. sinensis complete chloroplast genome, cultivar Roland
LN869225.1	Miscanthus sinensis subsp. sinensis complete chloroplast genome, cultivar Rigoletto
LN869224.1	Miscanthus sinensis var. purpurascens complete chloroplast genome, cultivar EF456
LN869223.1	Miscanthus sinensis subsp. sinensis complete chloroplast genome, cultivar Nippon
LN869222.1	Miscanthus sinensis subsp. sinensis complete chloroplast genome, cultivar Malepartus
LN869221.1	Miscanthus sinensis subsp. sinensis complete chloroplast genome, cultivar Dixieland
LN869220.1	Miscanthus sinensis subsp. condensatus complete chloroplast genome, cultivar Cabaret
LN869219.1	Miscanthus sacchariflorus complete chloroplast genome, cultivar Silver Banner Grass
LN869218.1	Miscanthus sacchariflorus complete chloroplast genome, cultivar Hercules
LN869217.1	Miscanthus sacchariflorus complete chloroplast genome, cultivar Golf Course
LN869216.1	Miscanthus junceus complete chloroplast genome
LN869215.1	Miscanthus floridulus complete chloroplast genome, cultivar PI295762
KY419704.1	Lepisorus clathratus chloroplast, complete genome
KY419703.1	Athyrium anisopterum chloroplast, complete genome
MF035974.1	Coelachne africana isolate Thomas3935 chloroplast, complete genome
KY363332.1	Allium sativum chloroplast, complete genome
MF346535.1	Caryopteris mongholica chloroplast, complete genome
MF357889.1	Citrullus colocynthis chloroplast, complete genome
KY863443.1	Solanum dulcamara chloroplast, complete genome
KY780370.1	UNVERIFIED: Oryza sativa Indica Group cultivar RP Bio-226 chloroplast sequence
KY753133.1	Musa itinerans chloroplast, complete genome
KY856959.1	Gentiana macrophylla chloroplast, complete genome
KY817592.1	Paeonia ludlowii voucher 20160519 chloroplast, complete genome
KY817591.1	Paeonia delavayi voucher 201605019 chloroplast, complete genome
KY856741.1	Camellia azalea chloroplast, complete genome
KT932966.1	Chaenomeles japonica chloroplast, complete genome
KY748302.1	Lilium henryi chloroplast, complete genome
KY748301.1	Lilium bakerianum chloroplast, complete genome
KY748300.1	Lilium duchartrei chloroplast, complete genome
KY748299.1	Lilium leucanthum chloroplast, complete genome
KY748298.1	Lilium primulinum var. ochraceum chloroplast, complete genome
KY748297.1	Lilium lancifolium chloroplast, complete genome
KY748296.1	Lilium brownii chloroplast, complete genome
MF035997.1	Styppeiochloa gynoglossa isolate Hilliard18774 chloroplast, complete genome
MF035996.1	Phragmites australis isolate Teisher101 chloroplast, complete genome
MF035995.1	Phragmites australis isolate GRIN chloroplast, complete genome
MF035994.1	Pheidochloa gracilis isolate Sharp391 chloroplast, complete genome
MF035993.1	Phaenanthoecium koestlinii isolate Wood1305 chloroplast, complete genome
MF035992.1	Nematopoa longipes isolate Simon2353 chloroplast, complete genome
MF035991.1	Monachather paradoxus isolate Lazarides149 chloroplast, complete genome
MF035990.1	Monachather paradoxus isolate Columbus5120 chloroplast, complete genome
MF035989.1	Molinia caerulea isolate Teisher98 chloroplast, complete genome
MF035988.1	Molinia caerulea isolate Teisher100 chloroplast, complete genome
MF035987.1	Limnopoa meeboldii isolate Cook282 chloroplast, complete genome
MF035986.1	Isachne albens isolate Lammers8452 chloroplast, complete genome
MF035985.1	Hakonechloa macra isolate Teisher99 chloroplast, complete genome
MF035984.1	Hakonechloa macra isolate Teisher97 chloroplast, complete genome
MF035983.1	Eriachne mucronata isolate Latz13498 chloroplast, complete genome
MF035982.1	Eragrostis walteri isolate Ingram656 chloroplast, complete genome
MF035981.1	Eragrostis tef isolate SRR1463402 chloroplast, complete genome
MF035980.1	Elytrophorus globularis isolate Ing692 chloroplast, complete genome
MF035979.1	Dregeochloa pumilla isolate Barker chloroplast, complete genome
MF035978.1	Dichaetaria wightii isolate Soderstrom1739 chloroplast, complete genome
MF035977.1	Danthoniopsis dinteri isolate SRR2163566 chloroplast, complete genome
MF035976.1	Crinipes longifolius isolate Gilbert1009 chloroplast, complete genome
MF035975.1	Crinipes abyssinicus isolate deWilde206 chloroplast, complete genome
MF035973.1	Chasmanthium laxum isolate SRR4128961 chloroplast, complete genome
MF035972.1	Arundo donax isolate Teisher96 chloroplast, complete genome
MF035971.1	Arundo donax isolate Teisher95 chloroplast, complete genome
MF035970.1	Amphipogon turbinatus isolate Kellogg1027 chloroplast, complete genome
MF035969.1	Amphipogon caricinus isolate Latz12610 chloroplast, complete genome
MF035968.1	Alloeochaete uluguruensis isolate Abeid3692 chloroplast, complete genome
MF035967.1	Alloeochaete oreogena isolate Chapman19 chloroplast, complete genome
MF035966.1	Alloeochaete namuliensis isolate Harris192 chloroplast, complete genome
KX229727.1	Phragmites australis voucher RSA:D. Bell 4664 chloroplast, complete genome
MF169880.1	Alyssum gmelinii chloroplast DNA, complete genome
KY807173.1	Musella lasiocarpa chloroplast, complete genome
KY769126.1	Fragaria orientalis chloroplast, complete genome
KY769125.1	Fragaria nipponica chloroplast, complete genome
KY792991.1	Zantedeschia aethiopica chloroplast, complete genome
KY707773.1	Themeda quadrivalvis isolate AL95 chloroplast, complete genome
KY707772.1	Themeda triandra isolate AL94 chloroplast, complete genome
KY707771.1	Themeda triandra isolate AL88 chloroplast, complete genome
KY707770.1	Themeda triandra isolate AL09 chloroplast, complete genome
KY707769.1	Heteropogon triticeus isolate AL07 chloroplast, complete genome
KY707768.1	Heteropogon sp. AL04 chloroplast, complete genome
KY707767.1	Themeda triandra isolate AL01 chloroplast, complete genome
KY707335.1	Phellodendron amurense voucher PAMU20170211 chloroplast, complete genome
KY794808.1	Hippophae rhamnoides chloroplast, complete genome
KY024482.1	Cynodon dactylon chloroplast, complete genome
KX377524.1	Aloe vera voucher Aloe vera chloroplast, complete genome
KX377523.1	Aloe maculata voucher Aloe_maculata chloroplast, complete genome
MF067398.1	Cressa cretica chloroplast, complete genome
KY912032.1	Braya humilis chloroplast, complete genome
KY912031.1	Morettia canescens chloroplast, complete genome
KY912030.1	Matthiola incana chloroplast, complete genome
KY912029.1	Lobularia libyca chloroplast, complete genome
KY912028.1	Chorispora tenella chloroplast, partial genome
KY912027.1	Hesperis sylvestris chloroplast, complete genome
KY912026.1	Hesperis matronalis chloroplast, complete genome
KY912025.1	Farsetia stylosa chloroplast, partial genome
KY912024.1	Euclidium syriacum chloroplast, partial genome
KY912023.1	Dontostemon micranthus chloroplast, partial genome
KY912022.1	Bunias orientalis chloroplast, partial genome
KY912021.1	Anastatica hierochuntica chloroplast, partial genome
KY636120.1	Elymus spicatus voucher PI 236672 chloroplast, partial genome
KY636112.1	Psathyrostachys juncea voucher PI 598613 chloroplast, partial genome
KY636099.1	Henrardia persica voucher RF 2012 1 chloroplast, partial genome
KY636080.1	Australopyrum retrofractum voucher PI 531553 chloroplast, partial genome
KY636068.1	Agropyron cristatum voucher PI 598631 chloroplast, partial genome
KY636062.1	Aegilops uniaristata voucher PI 276996 chloroplast, partial genome
KY636060.1	Aegilops uniaristata voucher AE 680 chloroplast, partial genome
KY636173.1	Triticum turgidum voucher DIC 169 chloroplast, partial genome
KY636147.1	Thinopyrum distichum voucher FB2014 008 chloroplast, partial genome
KY636122.1	Elymus stipifolius voucher PI 531751 chloroplast, partial genome
KY636081.1	Brachypodium pinnatum voucher AH 2011 chloroplast, partial genome
KY636058.1	Aegilops umbellulata voucher AE 740 chloroplast, partial genome
KY636042.1	Aegilops searsii voucher PI 599142 chloroplast, partial genome
KY636040.1	Aegilops searsii voucher KU 14655 chloroplast, partial genome
KY636039.1	Aegilops searsii voucher AE 1075 chloroplast, partial genome
KY636032.1	Aegilops markgrafii voucher PI 542208 chloroplast, partial genome
KY636021.1	Aegilops juvenalis voucher PI 574463 chloroplast, partial genome
KY636017.1	Aegilops cylindrica voucher ARM 5 chloroplast, partial genome
KY636016.1	Aegilops cylindrica voucher AE 836 chloroplast, partial genome
KY636011.1	Aegilops comosa voucher PI 276970 chloroplast, partial genome
KT589392.1	Hydrocotyle sibthorpioides chloroplast, complete genome
KY636181.1	Triticum zhukovskyi voucher TRI 7258 chloroplast, partial genome
KY636180.1	Triticum urartu voucher PI 428317 chloroplast, partial genome
KY636179.1	Triticum urartu voucher PI 428320 chloroplast, partial genome
KY636178.1	Triticum urartu voucher PI 428184 chloroplast, partial genome
KY636177.1	Triticum urartu voucher TRI 17824 chloroplast, partial genome
KY636176.1	Triticum urartu voucher TRI 18407 chloroplast, partial genome
KY636175.1	Triticum turgidum voucher TRI 6243 chloroplast, partial genome
KY636171.1	Triticum turgidum voucher PI 428093 chloroplast, partial genome
KY636169.1	Triticum turgidum voucher PI 352322 chloroplast, partial genome
KY636168.1	Triticum turgidum voucher TRI 3428 chloroplast, partial genome
KY636167.1	Triticum timopheevii voucher 01C0202037 chloroplast, partial genome
KY636166.1	Triticum timopheevii voucher KU 1820 chloroplast, partial genome
KY636165.1	Triticum timopheevii voucher KU 8561 chloroplast, partial genome
KY636164.1	Triticum timopheevii voucher PI 352264 chloroplast, partial genome
KY636163.1	Triticum timopheevii voucher KU 1966 chloroplast, partial genome
KY636162.1	Triticum monococcum voucher BGRC 20518 chloroplast, partial genome
KY636161.1	Triticum monococcum voucher TRI 13612 chloroplast, partial genome
KY636160.1	Triticum monococcum voucher PI 427620 chloroplast, partial genome
KY636158.1	Triticum monococcum voucher BGRC 43459 chloroplast, partial genome
KY636157.1	Triticum monococcum voucher PI 272520 chloroplast, partial genome
KY636156.1	Triticum monococcum voucher TRI 13061 chloroplast, partial genome
KY636155.1	Triticum monococcum voucher ID 379 chloroplast, partial genome
KY636152.1	Triticum aestivum voucher TRI 11555 chloroplast, partial genome
KY636150.1	Triticum aestivum voucher PI 83402 chloroplast, partial genome
KY636148.1	Thinopyrum elongatum voucher PI 109452 chloroplast, partial genome
KY636145.1	Thinopyrum bessarabicum voucher W6 21890 chloroplast, partial genome
KY636144.1	Taeniatherum caput-medusae voucher GRA 1126 chloroplast, partial genome
KY636143.1	Taeniatherum caput-medusae voucher PI 220589 chloroplast, partial genome
KY636142.1	Taeniatherum caput-medusae voucher PI 561095 chloroplast, partial genome
KY636141.1	Taeniatherum caput-medusae voucher PI 251387 chloroplast, partial genome
KY636140.1	Taeniatherum caput-medusae voucher CK 2011 chloroplast, partial genome
KY636139.1	Taeniatherum caput-medusae voucher GRA 2570 chloroplast, partial genome
KY636138.1	Secale strictum voucher R 853 chloroplast, partial genome
KY636137.1	Secale strictum voucher R 1108 chloroplast, partial genome
KY636136.1	Secale cereale voucher PI 618669 chloroplast, partial genome
KY636134.1	Secale cereale voucher R 1027 chloroplast, partial genome
KY636133.1	Secale cereale voucher PI 618665 chloroplast, partial genome
KY636132.1	Secale cereale voucher PI 618671 chloroplast, partial genome
KY636131.1	Elymus tauri voucher PI 401333 chloroplast, partial genome
KY636129.1	Elymus tauri voucher PI 401322 chloroplast, partial genome
KY636128.1	Elymus tauri voucher PI 228389 chloroplast, partial genome
KY636127.1	Pseudoroegneria strigosa voucher PI 595172 chloroplast, partial genome
KY636126.1	Pseudoroegneria strigosa voucher W6 14049 chloroplast, partial genome
KY636124.1	Pseudoroegneria strigosa voucher PI 639805 chloroplast, partial genome
KY636121.1	Elymus stipifolius voucher PI 325181 chloroplast, partial genome
KY636119.1	Elymus spicatus voucher PI 635993 chloroplast, partial genome
KY636118.1	Elymus spicatus voucher PI 632532 chloroplast, partial genome
KY636117.1	Elymus cognatus voucher GRA 1308 chloroplast, partial genome
KY636116.1	Psathyrostachys juncea voucher PI 619487 chloroplast, partial genome
KY636113.1	Psathyrostachys juncea voucher PI 565080 chloroplast, partial genome
KY636111.1	Psathyrostachys juncea voucher PI 595135 chloroplast, partial genome
KY636110.1	Hordeum vulgare voucher Morex chloroplast, partial genome
KY636109.1	Hordeum vulgare voucher FT11 chloroplast, partial genome
KY636108.1	Hordeum pubiflorum voucher BCC 2028 chloroplast, partial genome
KY636107.1	Hordeum murinum voucher BCC 2002 chloroplast, partial genome
KY636106.1	Hordeum marinum voucher BCC 2006 chloroplast, partial genome
KY636105.1	Hordeum bulbosum voucher KP 2012 108 chloroplast, partial genome
KY636104.1	Heteranthelium piliferum voucher PI 401353 chloroplast, partial genome
KY636103.1	Heteranthelium piliferum voucher PI 314152 chloroplast, partial genome
KY636101.1	Heteranthelium piliferum voucher PI 401351 chloroplast, partial genome
KY636100.1	Henrardia persica voucher PI 401347 chloroplast, partial genome
KY636098.1	Henrardia persica voucher PI 577113 chloroplast, partial genome
KY636097.1	Henrardia persica voucher PI 577112 chloroplast, partial genome
KY636095.1	Eremopyrum triticeum voucher GRA 2250 chloroplast, partial genome
KY636094.1	Eremopyrum triticeum voucher W6 26631 chloroplast, partial genome
KY636093.1	Eremopyrum bonaepartis voucher PI 219962 chloroplast, partial genome
KY636092.1	Eremopyrum bonaepartis voucher GRA 789 chloroplast, partial genome
KY636091.1	Eremopyrum bonaepartis voucher PI 222956 chloroplast, partial genome
KY636090.1	Eremopyrum bonaepartis voucher PI 203442 chloroplast, partial genome
KY636089.1	Eremopyrum bonaepartis voucher GRA 1120 chloroplast, partial genome
KY636086.1	Dasypyrum villosum voucher GRA 1020 chloroplast, partial genome
KY636085.1	Dasypyrum villosum voucher W6 19414 chloroplast, partial genome
KY636084.1	Dasypyrum villosum voucher GRA 1027 chloroplast, partial genome
KY636082.1	Bromus inermis voucher W6 21403 chloroplast, partial genome
KY636079.1	Australopyrum retrofractum voucher PI 547363 chloroplast, partial genome
KY636078.1	Australopyrum retrofractum voucher PI 533013 chloroplast, partial genome
KY636077.1	Australopyrum retrofractum voucher PI 533014 chloroplast, partial genome
KY636076.1	Amblyopyrum muticum voucher PI 560122 chloroplast, partial genome
KY636075.1	Amblyopyrum muticum voucher PI 560125 chloroplast, partial genome
KY636074.1	Amblyopyrum muticum voucher PI 560126 chloroplast, partial genome
KY636072.1	Amblyopyrum muticum voucher PI 560124 chloroplast, partial genome
KY636071.1	Amblyopyrum muticum voucher PI 636562 chloroplast, partial genome
KY636069.1	Agropyron cristatum voucher W6 25117 chloroplast, partial genome
KY636067.1	Agropyron cristatum voucher W6 19302 chloroplast, partial genome
KY636065.1	Agropyron cristatum voucher PI 406438 chloroplast, partial genome
KY636064.1	Aegilops ventricosa voucher AE 785 chloroplast, partial genome
KY636063.1	Aegilops ventricosa voucher AE 760 chloroplast, partial genome
KY636061.1	Aegilops uniaristata voucher AE 157 chloroplast, partial genome
KY636059.1	Aegilops umbellulata voucher AE 153 chloroplast, partial genome
KY636057.1	Aegilops umbellulata voucher AE 811 chloroplast, partial genome
KY636056.1	Aegilops umbellulata voucher AE 1070 chloroplast, partial genome
KY636055.1	Aegilops triuncialis voucher AE 922 chloroplast, partial genome
KY636054.1	Aegilops triuncialis voucher AE 516 chloroplast, partial genome
KY636052.1	Aegilops tauschii voucher AE 1069 chloroplast, partial genome
KY636051.1	Aegilops tauschii voucher AE 956 chloroplast, partial genome
KY636050.1	Aegilops tauschii voucher 46800 chloroplast, partial genome
KY636049.1	Aegilops speltoides voucher PI 542245 chloroplast, partial genome
KY636048.1	Aegilops speltoides voucher PI 486240 chloroplast, partial genome
KY636047.1	Aegilops speltoides voucher AE 900 chloroplast, partial genome
KY636046.1	Aegilops speltoides voucher KU 7856 chloroplast, partial genome
KY636045.1	Aegilops speltoides voucher AE 1064 chloroplast, partial genome
KY636043.1	Aegilops sharonensis voucher AE 906 chloroplast, partial genome
KY636041.1	Aegilops searsii voucher AE 1083 chloroplast, partial genome
KY636038.1	Aegilops peregrina voucher AE 548 chloroplast, partial genome
KY636037.1	Aegilops neglecta voucher ARM 20 chloroplast, partial genome
KY636036.1	Aegilops neglecta voucher KP 2012049 chloroplast, partial genome
KY636034.1	Aegilops neglecta voucher AE 586 chloroplast, partial genome
KY636031.1	Aegilops markgrafii voucher KP 2012106 chloroplast, partial genome
KY636028.1	Aegilops longissima voucher PI 604141 chloroplast, partial genome
KY636026.1	Aegilops longissima voucher AE 417 chloroplast, partial genome
KY636025.1	Aegilops longissima voucher AE 133 chloroplast, partial genome
KY636024.1	Aegilops longissima voucher TA 1921 chloroplast, partial genome
KY636023.1	Aegilops kotschyi voucher AE 84 chloroplast, partial genome
KY636020.1	Aegilops geniculata voucher FB2012013B chloroplast, partial genome
KY636018.1	Aegilops geniculata voucher FB2012007B chloroplast, partial genome
KY636015.1	Aegilops crassa voucher AE 742 chloroplast, partial genome
KY636014.1	Aegilops crassa voucher PI 276972 chloroplast, partial genome
KY636013.1	Aegilops crassa voucher AE 161 chloroplast, partial genome
KY636012.1	Aegilops comosa voucher AE 1255 chloroplast, partial genome
KY636010.1	Aegilops comosa voucher AE 783 chloroplast, partial genome
KY636006.1	Aegilops biuncialis voucher AE 944 chloroplast, partial genome
KY636005.1	Aegilops biuncialis voucher KP 2012119 chloroplast, partial genome
KY636004.1	Aegilops biuncialis voucher KP 2012105 a chloroplast, partial genome
KY636003.1	Aegilops biuncialis voucher PI 614609 chloroplast, partial genome
KY636000.1	Aegilops bicornis voucher AE 1079 chloroplast, partial genome
KU050690.1	Sinapis arvensis chloroplast, complete genome
KT852702.1	Cucumis sativus var. hardwickii chloroplast, complete genome
LN849914.1	Saccharum hybrid chloroplast complete genome, cultivar RB72454
LN849913.1	Saccharum officinarum chloroplast complete genome, cultivar IJ76-514
LN849912.1	Saccharum spontaneum chloroplast complete genome, cultivar SES234B
KY636151.1	Triticum aestivum voucher BK 2011 chloroplast, partial genome
KY636146.1	Thinopyrum distichum voucher FB2014 011 chloroplast, partial genome
KY636135.1	Secale cereale voucher PI 253957 chloroplast, partial genome
KY636035.1	Aegilops neglecta voucher AE 857 chloroplast, partial genome
KY636033.1	Aegilops markgrafii voucher AE 1381 chloroplast, partial genome
KY636019.1	Aegilops geniculata voucher KP 2012100 chloroplast, partial genome
KY636008.1	Aegilops columnaris voucher PI 428558 chloroplast, partial genome
KY636007.1	Aegilops columnaris voucher PI 487196 chloroplast, partial genome
KY951992.1	Castanea mollissima chloroplast, complete genome
KX349219.1	Caragana kozlowii chloroplast, complete genome
KX289923.1	Caragana korshinskii chloroplast, complete genome
KX437745.1	Machilus thunbergii chloroplast, complete genome
KX437744.1	Machilus pauhoi chloroplast, complete genome
KY709672.1	Sinojackia xylocarpa voucher SXYL20170211 chloroplast, complete genome
KY679201.1	Dionaea muscipula chloroplast, complete genome
KY679200.1	Aldrovanda vesiculosa voucher PERTH_08722560 chloroplast, complete genome
KY679199.1	Drosera regia chloroplast, complete genome
KY679303.1	Viscum coloratum chloroplast, complete genome
KX868670.1	Platycarya strobilacea chloroplast, complete genome
KY612322.1	UNVERIFIED: Pomatosace filicula chloroplast sequence
KX852441.2	Pararchidendron pruinosum chloroplast, complete genome
KX852440.2	Faidherbia albida chloroplast, complete genome
KX852439.2	Dichrostachys cinerea chloroplast, complete genome
KX852445.1	Samanea saman chloroplast, complete genome
KX852444.1	Pithecellobium flexicaule chloroplast, complete genome
KX852443.1	Piptadenia communis chloroplast, complete genome
KX852442.1	Parkia javanica chloroplast, complete genome
LC192810.1	Dendrobium primulinum chloroplast DNA, complete genome
LC085348.1	Vanilla aphylla chloroplast DNA, complete genome
LC085347.1	Paphiopedilum armeniacum chloroplast DNA, complete genome
LC085346.1	Goodyera schlechtendaliana chloroplast DNA, complete genome
AB893950.1	Dendrobium moniliforme chloroplast DNA, complete genome
AB893949.1	Goodyera schlechtendaliana chloroplast DNA, complete genome
KX852438.1	Archidendron lucyi chloroplast, complete genome
KX852437.1	Albizia odoratissima chloroplast, complete genome
KX852436.1	Adenanthera microsperma chloroplast, complete genome
KX852435.1	Acacia dealbata chloroplast, complete genome
KY635884.1	Chenopodium quinoa chloroplast, complete genome
KY635883.1	Punica granatum chloroplast, complete genome
KY635882.1	Mangifera indica chloroplast, complete genome
KY635881.1	Litchi chinensis chloroplast, complete genome
KY635880.1	Ficus carica chloroplast, complete genome
KY635879.1	Psidium guajava chloroplast, complete genome
KY635878.1	Cinnamomum verum chloroplast, complete genome
KY635877.1	Anacardium occidentale chloroplast, complete genome
KY635876.1	Abelmoschus esculentus chloroplast, complete genome
KY646163.1	Salvia japonica chloroplast, complete genome
KT727930.1	Silene capitata chloroplast, complete genome
KT727929.1	Lychnis wilfordii chloroplast, complete genome
KY623639.1	Ocimum basilicum chloroplast, complete genome
KX928992.1	Cistanthe longiscapa chloroplast, complete genome
KX352465.1	Aster altaicus chloroplast, complete genome
KY926621.1	Berchemiella wilsonii var. wilsonii chloroplast, complete genome
KX256185.1	Tsuga sp. GH-2017 chloroplast, partial genome
KX256184.1	Tsuga sieboldii chloroplast, partial genome
KX256183.1	Tsuga heterophylla chloroplast, partial genome
KX256182.1	Tsuga diversifolia chloroplast, partial genome
KX256181.1	Tsuga chinensis chloroplast, partial genome
KX256180.1	Tsuga caroliniana chloroplast, partial genome
KX249803.1	UNVERIFIED: Nothotsuga longibracteata chloroplast sequence
KR476379.1	Pinus sylvestris chloroplast, complete genome
KR476378.1	Juniperus communis chloroplast, complete genome
KR476377.1	Gnetum gnemon chloroplast, complete genome
KR476376.1	Abies sibirica chloroplast, complete genome
KR476375.1	Taxus baccata chloroplast, complete genome
KX388160.1	Maackia floribunda chloroplast, complete genome
KX808494.1	Hansenia forrestii chloroplast, complete genome
KX808493.1	Hansenia oviformis chloroplast, complete genome
KX808492.1	Hansenia forbesii chloroplast, complete genome
KX808491.1	Hansenia weberbaueriana chloroplast, complete genome
KY596185.1	Arthraxon lanceolatus chloroplast, complete genome
KY596184.1	Garnotia tenella chloroplast, complete genome
KY596183.1	Arthraxon microphyllus chloroplast, complete genome
KY596182.1	Eulaliopsis binata chloroplast, complete genome
KY596181.1	Schizachyrium sanguineum chloroplast, complete genome
KY596180.1	Andropogon fastigiatus chloroplast, complete genome
KY596179.1	Arthraxon hispidus chloroplast, complete genome
KY596178.1	Polytoca digitata chloroplast, complete genome
KY596177.1	Chrysopogon orientalis chloroplast, complete genome
KY596176.1	Heteropogon triticeus chloroplast, complete genome
KY596175.1	Germainia capitata chloroplast, complete genome
KY596174.1	Schizachyrium imberbe chloroplast, complete genome
KY596173.1	Polytoca digitata chloroplast, complete genome
KY596172.1	Schizachyrium tenerum chloroplast, complete genome
KY596171.1	Garnotia thailandica chloroplast, complete genome
KY596170.1	Andropogon distachyos chloroplast, complete genome
KY596169.1	Cymbopogon flexuosus chloroplast, complete genome
KY596168.1	Schizachyrium brevifolium chloroplast, complete genome
KY596167.1	Andropogon burmanicus chloroplast, complete genome
KY596166.1	Schizachyrium spicatum chloroplast, complete genome
KY596165.1	Schizachyrium sanguineum chloroplast, complete genome
KY596164.1	Andropogon burmanicus chloroplast, complete genome
KY596163.1	Hyparrhenia diplandra chloroplast, complete genome
KY596162.1	Mnesithea helferi chloroplast, complete genome
KY596161.1	Chrysopogon gryllus chloroplast, complete genome
KY596160.1	Coix lacryma-jobi chloroplast, complete genome
KY596159.1	Heteropogon triticeus chloroplast, complete genome
KY596158.1	Chrysopogon zizanioides chloroplast, complete genome
KY596157.1	Pseudosorghum fasciculare chloroplast, complete genome
KY596156.1	Hyparrhenia rufa chloroplast, complete genome
KY596155.1	Parahyparrhenia siamensis chloroplast, complete genome
KY596154.1	Schizachyrium scoparium chloroplast, complete genome
KY596153.1	Heteropogon triticeus chloroplast, complete genome
KY596152.1	Andropogon fastigiatus chloroplast, complete genome
KY596151.1	Schizachyrium brevifolium chloroplast, complete genome
KY596150.1	Schizachyrium brevifolium chloroplast, complete genome
KY596149.1	Eulalia siamensis chloroplast, complete genome
KY596148.1	Andropogon abyssinicus chloroplast, complete genome
KY596147.1	Schizachyrium exile chloroplast, complete genome
KY596146.1	Eremochloa ciliaris chloroplast, complete genome
KY596145.1	Heteropogon contortus chloroplast, complete genome
KY596144.1	Andropogon fastigiatus chloroplast, complete genome
KY596143.1	Eulalia contorta chloroplast, complete genome
KY596142.1	Heteropogon triticeus chloroplast, complete genome
KY596141.1	Schizachyrium sanguineum chloroplast, complete genome
KY596140.1	Schizachyrium sanguineum chloroplast, complete genome
KY596139.1	Pseudosorghum fasciculare chloroplast, complete genome
KY596138.1	Arthraxon prionodes chloroplast, complete genome
KY596137.1	Schizachyrium sanguineum chloroplast, complete genome
KY596136.1	Hemisorghum mekongense chloroplast, complete genome
KY596135.1	Schizachyrium brevifolium chloroplast, complete genome
KY596134.1	Eremochloa eriopoda chloroplast, complete genome
KY596133.1	Andropogon chinensis chloroplast, complete genome
KY596132.1	Hemisorghum mekongense chloroplast, complete genome
KY596131.1	Themeda villosa chloroplast, complete genome
KY596130.1	Dimeria ornithopoda chloroplast, complete genome
KY596129.1	Themeda arguens chloroplast, complete genome
KY596128.1	Dichanthium sericeum chloroplast, complete genome
KY596127.1	Arthraxon lanceolatus chloroplast, complete genome
KY596126.1	Andropogon chinensis chloroplast, complete genome
KY596125.1	Themeda triandra chloroplast, complete genome
KY596124.1	Schizachyrium sanguineum chloroplast, complete genome
KY596123.1	Themeda arundinacea chloroplast, complete genome
KY596122.1	Schizachyrium brevifolium chloroplast, complete genome
KY596121.1	Andropogon chinensis chloroplast, complete genome
KY596120.1	Kerriochloa siamensis chloroplast, complete genome
KY596119.1	Hyparrhenia rufa chloroplast, complete genome
KY596118.1	Andropogon fastigiatus chloroplast, complete genome
KY596117.1	Kerriochloa siamensis chloroplast, complete genome
KY595463.1	Gentiana crassicaulis voucher YN201601-1 chloroplast, complete genome
KY595462.1	Gentiana crassicaulis voucher SC201602-1 chloroplast, complete genome
KY595461.1	Gentiana crassicaulis voucher SC201601-1 chloroplast, complete genome
KY595460.1	Gentiana crassicaulis voucher GZ201601-1 chloroplast, complete genome
KY595459.1	Gentiana crassicaulis voucher GS201601-1 chloroplast, complete genome
KY595458.1	Gentiana crassicaulis voucher 2016XZ011-1 chloroplast, complete genome
KY595457.1	Gentiana crassicaulis voucher XZ201214-4 chloroplast, complete genome
KY476637.1	Morella rubra isolate GZMZ chloroplast, complete genome
KY476636.1	Morella rubra isolate FJZS chloroplast, complete genome
KY476635.1	Morella rubra isolate YNML chloroplast, complete genome
KY606171.1	Gentiana crassicaulis chloroplast, complete genome
KY582962.1	Chionanthus retusus chloroplast, complete genome
LT855378.1	Betula pendula genome assembly, organelle: plastid:chloroplast
KY419708.1	Solanum berthaultii voucher PI310981 chloroplast, complete genome
KY419707.1	Chenopodium album voucher KWNU81461 chloroplast, complete genome
KY419706.1	Chenopodium quinoa voucher IT123455 chloroplast, complete genome
KY369757.1	Torreya grandis chloroplast, complete genome
KU318111.1	Plinia trunciflora chloroplast, complete genome
KY628420.1	Vernicia fordii chloroplast, complete genome
KX139746.1	Saccharum spontaneum chloroplast, complete genome
LC177668.1	Chamaecyparis formosensis chloroplast DNA, complete genome
LC177621.1	Dacrycarpus imbricatus chloroplast DNA, complete genome
LC177556.1	Taxodium distichum chloroplast DNA, complete genome
LC177555.1	Callitris rhomboidea chloroplast DNA, complete genome
KY412468.1	Hydrangea serrata isolate HS1500 chloroplast, complete genome
KY412467.1	Schizophragma hydrangeoides chloroplast, complete genome
KY412466.1	Hydrangea petiolaris chloroplast, complete genome
KY412465.1	Hydrangea serrata isolate HS1200 chloroplast, complete genome
KY412464.1	Hydrangea serrata cultivar Japanese Hydrangea serrata chloroplast, complete genome
KY412463.1	Hydrangea serrata isolate Ja1 chloroplast, complete genome
KY412462.1	Hydrangea serrata cultivar Hallasan chloroplast, complete genome
KX880508.1	Larix potaninii var. chinensis chloroplast, complete genome
KY346512.1	Phoebe bournei chloroplast, complete genome
KY346511.1	Phoebe chekiangensis chloroplast, complete genome
KX231330.1	Cucumis sativus hybrid Chinese long green (CFND) x Korean solid green (MGLCC) chloroplast, complete genome
KX231329.1	Cucumis sativus hybrid Korean solid green (MGLCC) x Chinese long green (CFND) chloroplast, complete genome
KX231328.1	Cucumis sativus variety Chinese long green (CFND) chloroplast, complete genome
KX231327.1	Cucumis sativus variety Korean solid green (MGLCC) chloroplast, complete genome
KY392754.1	Cupressus chengiana chloroplast, complete genome
KY364194.1	Asparagus officinalis chloroplast, complete genome
KY652203.1	UNVERIFIED: Gaultheria trichophylla var. trichophylla chloroplast sequence
KY652199.1	UNVERIFIED: Gaultheria stenophylla chloroplast sequence
KY652198.1	UNVERIFIED: Gaultheria stenophylla chloroplast sequence
KY652197.1	UNVERIFIED: Gaultheria sp. LL-2013-54 chloroplast sequence
KY652194.1	UNVERIFIED: Gaultheria praticola chloroplast sequence
KY652193.1	UNVERIFIED: Gaultheria obovata chloroplast sequence
KY652192.1	UNVERIFIED: Gaultheria nummularioides chloroplast sequence
KY652191.1	UNVERIFIED: Gaultheria nivea chloroplast sequence
KY652190.1	UNVERIFIED: Gaultheria nivea chloroplast sequence
KY652188.1	UNVERIFIED: Gaultheria marronina chloroplast sequence
KY652187.1	UNVERIFIED: Gaultheria major chloroplast sequence
KY652186.1	UNVERIFIED: Gaultheria major chloroplast sequence
KY652185.1	UNVERIFIED: Gaultheria jingdongensis chloroplast sequence
KY652184.1	UNVERIFIED: Gaultheria hypochlora chloroplast sequence
KY652183.1	UNVERIFIED: Gaultheria hookeri chloroplast sequence
KY652182.1	UNVERIFIED: Gaultheria gonggashanensis chloroplast sequence
KY652181.1	UNVERIFIED: Gaultheria eciliata chloroplast sequence
KY652180.1	UNVERIFIED: Gaultheria dolichopoda chloroplast sequence
KY652179.1	UNVERIFIED: Gaultheria crassifolia chloroplast sequence
KY652178.1	UNVERIFIED: Gaultheria ciliisepala chloroplast sequence
KY652177.1	UNVERIFIED: Gaultheria ciliisepala chloroplast sequence
KY652176.1	UNVERIFIED: Gaultheria ciliisepala chloroplast sequence
KY652175.1	UNVERIFIED: Gaultheria cardiosepala chloroplast sequence
KX966283.1	UNVERIFIED: Vatica odorata chloroplast sequence
KX792501.1	UNVERIFIED: Solanum elaeagnifolium chloroplast sequence
KX792500.1	UNVERIFIED: Nassella trichotoma chloroplast sequence
KX792499.1	UNVERIFIED: Conyza bonariensis chloroplast sequence
KX258653.1	Tetradoxa omeiensis chloroplast, complete genome
KX258652.1	Adoxa moschatellina chloroplast, complete genome
KY174338.1	Carpinus tientaiensis chloroplast, complete genome
KX229726.1	Eriachne armittii voucher CAN:J. Saarela 1808 chloroplast, complete genome
KX289887.1	Acca sellowiana chloroplast, complete genome
CP018170.1	Oryza sativa Indica Group cultivar Shuhui498 chloroplast, complete genome
KX904877.1	Fargesia denudata chloroplast, complete genome
KY745894.1	Melastoma candidum chloroplast, complete genome
KY419137.1	Acer buergerianum chloroplast, complete genome
KY419136.1	Hevea brasiliensis isolate 90 chloroplast, complete genome
KY419135.1	Hevea brasiliensis isolate 89 chloroplast, complete genome
KY419134.1	Hevea brasiliensis isolate 88 chloroplast, complete genome
KY419133.1	Hevea brasiliensis isolate 87 chloroplast, complete genome
KY363223.1	Hevea brasiliensis isolate 84 chloroplast, complete genome
KY363222.1	Hevea brasiliensis isolate 80 chloroplast, complete genome
KY363221.1	Hevea brasiliensis isolate 79 chloroplast, complete genome
KY363220.1	Hevea brasiliensis isolate 78 chloroplast, complete genome
KY363219.1	Hevea brasiliensis isolate 75 chloroplast, complete genome
KY363218.1	Hevea brasiliensis isolate 73 chloroplast, complete genome
KY363217.1	Hevea brasiliensis isolate 68 chloroplast, complete genome
KY363216.1	Hevea brasiliensis isolate 67 chloroplast, complete genome
KY034454.1	Ammopiptanthus nanus chloroplast, complete genome
KY034453.1	Ammopiptanthus mongolicus chloroplast, complete genome
KY401426.1	Amana kuocangshanica chloroplast, complete genome
KY401425.1	Amana edulis chloroplast, complete genome
KY401424.1	Amana erythronioides chloroplast, complete genome
KY401423.1	Amana anhuiensis chloroplast, complete genome
KY401422.1	Amana wanzhensis chloroplast, complete genome
KY401421.1	Amana erythronioides chloroplast, complete genome
KY085919.1	Illicium anisatum plastid, complete genome
KY085918.1	Hydrastis canadensis plastid, complete genome
KY085910.1	Illicium henryi plastid, complete genome
KY085908.1	Mitragyna speciosa plastid, complete genome
KY085901.1	Eleutherococcus senticosus plastid, complete genome
KY085900.1	Scutellaria lateriflora plastid, complete genome
KY085890.1	Artemisia annua plastid, complete genome
KX118044.1	Angelica gigas cultivar Manchu chloroplast, complete genome
KF359922.1	Leersia japonica chloroplast, complete genome
KF359921.1	Oryza meyeriana chloroplast, complete genome
KF359920.1	Oryza granulata chloroplast, complete genome
KF359919.1	Oryza ridleyi chloroplast, complete genome
KF359918.1	Oryza longiglumis chloroplast, complete genome
KF359917.1	Oryza brachyantha chloroplast, complete genome
KF359916.1	Oryza australiensis chloroplast, complete genome
KF359915.1	Oryza latifolia chloroplast, complete genome
KF359914.1	Oryza grandiglumis chloroplast, complete genome
KF359913.1	Oryza alta chloroplast, complete genome
KF359912.1	Oryza eichingeri chloroplast, complete genome
KF359911.1	Oryza rhizomatis chloroplast, complete genome
KF359910.1	Oryza officinalis chloroplast, complete genome
KF359909.1	Oryza minuta chloroplast, complete genome
KF359908.1	Oryza punctata chloroplast, complete genome
KF359907.1	Oryza longistaminata chloroplast, complete genome
KF359906.1	Oryza meridionalis chloroplast, complete genome
KF359905.1	Oryza glumipatula chloroplast, complete genome
KF359904.1	Oryza barthii chloroplast, complete genome
KF359903.1	Oryza glaberrima chloroplast, complete genome
KF359902.1	Oryza rufipogon chloroplast, complete genome
KF359901.1	Oryza nivara chloroplast, complete genome
KX148081.1	Anaphalis sinica chloroplast, complete genome
KU513438.1	Androsace bulleyana chloroplast, complete genome
KU513437.1	Androsace paxiana chloroplast, complete genome
KX668178.1	Primula chrysochlora chloroplast, complete genome
KX668176.1	Primula stenodonta chloroplast, complete genome
KY126841.1	Arabis stelleri subsp. japonica chloroplast, complete genome
KX109946.1	Arundo plinii chloroplast, complete genome
KX109945.1	Arundo donax chloroplast, complete genome
KF572029.1	Lagerstroemia subcostata chloroplast, complete genome
KF572028.1	Lagerstroemia indica chloroplast, complete genome
KY231152.1	Lepidium meyenii chloroplast, complete genome
KY100980.1	Actinidia kolomikta chloroplast, complete genome
KY100979.1	Actinidia eriantha chloroplast, complete genome
KY100978.1	Actinidia arguta chloroplast, complete genome
KX354692.1	Lilium cernuum chloroplast, complete genome
KJ956785.1	Clematis terniflora chloroplast, complete genome
KY117036.1	Carpinus tientaiensis chloroplast, complete genome
KY626169.1	Pyrus pashia voucher PPASH20160703 chloroplast, complete genome
KY111264.1	Schisandra chinensis chloroplast, complete genome
KY075853.1	UNVERIFIED: Drynaria roosii chloroplast sequence
KX063946.1	Diplostephium sp. CAJ2 voucher F:Sanchez 11193 chloroplast, complete genome
KX063945.1	Diplostephium ochraceum voucher ANDES:Vargas 161 chloroplast, complete genome
KX063944.1	Diplostephium hippophae voucher HUSA:Vargas 393 chloroplast, complete genome
KX063943.1	Diplostephium apiculatum voucher ANDES:Vargas 332 chloroplast, complete genome
KX063942.1	Diplostephium pulchrum voucher HUSA:Ortiz 722 chloroplast, complete genome
KX063941.1	Diplostephium oblanceolatum voucher QCA:Vargas 465 chloroplast, complete genome
KX063940.1	Diplostephium goodspeedii voucher HUSA:Vargas 373 chloroplast, complete genome
KX063939.1	Diplostephium rosmarinifolium voucher ANDES:Vargas 304 chloroplast, complete genome
KX063938.1	Diplostephium sp. CAJ2 voucher HUSA:Vargas 415 chloroplast, complete genome
KX063937.1	Diplostephium coriaceum voucher US:Barclay 6691 chloroplast, complete genome
KX063936.1	Diplostephium schultzii voucher ANDES:Vargas 500 chloroplast, complete genome
KX063935.1	Aztecaster matudae voucher TEX:Hinton 29102 chloroplast, complete genome
KX063934.1	Diplostephium jenesanum voucher ANDES:Vargas 509 chloroplast, complete genome
KX063933.1	Diplostephium camargoanum voucher ANDES:Vargas 319 chloroplast, complete genome
KX063932.1	Diplostephium sagasteguii voucher F:Sagastegui 16951 chloroplast, complete genome
KX063931.1	Diplostephium heterophyllum voucher ANDES:Vargas 162 chloroplast, complete genome
KX063930.1	Diplostephium inesianum voucher US:Barclay 6546 chloroplast, complete genome
KX063929.1	Diplostephium mutiscuanum voucher ANDES:Vargas 346 chloroplast, complete genome
KX063928.1	Diplostephium jaramilloi voucher FMB:Prieto 1118 chloroplast, complete genome
KX063927.1	Diplostephium frontinense voucher ANDES:Vargas 524 chloroplast, complete genome
KX063926.1	Diplostephium schultzii voucher ANDES:Vargas 164 chloroplast, complete genome
KX063925.1	Diplostephium empetrifolium voucher QCA:Vargas 469 chloroplast, complete genome
KX063924.1	Diplostephium serratifolium voucher F:Sagastegui 16159a chloroplast, complete genome
KX063923.1	Parastrephia quadrangularis voucher HUSA:Vargas 440 chloroplast, complete genome
KX063922.1	Diplostephium tachirense voucher ANDES:Vargas 336 chloroplast, complete genome
KX063921.1	Westoniella kohkemperi voucher TEX:Pruskii 3925 chloroplast, complete genome
KX063920.1	Diplostephium obtusum voucher US:Dorr 9246 chloroplast, complete genome
KX063919.1	Diplostephium meyenii voucher HUSA:Vargas 351 chloroplast, complete genome
KX063918.1	Diplostephium sp. CAJ2 voucher HUSA:Vargas 427 chloroplast, complete genome
KX063917.1	Diplostephium spinulosum voucher ANDES:Vargas 445 chloroplast, complete genome
KX063916.1	Floscaldasia hypsophila voucher ANDES:Cleef 10912 chloroplast, complete genome
KX063915.1	Diplostephium huertasii voucher ANDES:Vargas 518 chloroplast, complete genome
KX063914.1	Diplostephium venezuelense voucher US:Norrbom 89V33 chloroplast, complete genome
KX063913.1	Diplostephium juajibioyi voucher ANDES:Vargas 50 chloroplast, complete genome
KX063912.1	Diplostephium cayambense voucher ANDES:Vargas 234 chloroplast, complete genome
KX063911.1	Diplostephium romeroi voucher US:Barclay 6775 chloroplast, complete genome
KX063910.1	Hinterhubera ericoides voucher TEX:Stergios 20385 chloroplast, complete genome
KX063909.1	Diplostephium foliosissimum voucher F:Sagastegui 16804 chloroplast, complete genome
KX063908.1	Llerasia caucana voucher ANDES:Vargas 444 chloroplast, complete genome
KX063907.1	Diplostephium azureum voucher HUSA:Vargas 389 chloroplast, complete genome
KX063906.1	Diplostephium oblongifolium voucher ANDES:Vargas 344 chloroplast, complete genome
KX063905.1	Diplostephium crypteriophyllum voucher QCA:Vargas 467 chloroplast, complete genome
KX063904.1	Diplostephium sp. CAJ2 voucher HUSA:Vargas 419 chloroplast, complete genome
KX063903.1	Diplostephium espinosae voucher QCA:Vargas 464 chloroplast, complete genome
KX063902.1	Diplostephium sp. CAJ2 voucher F:Sagastegui 15758 chloroplast, complete genome
KX063901.1	Diplostephium costaricense voucher TEX:Martinez 33 chloroplast, complete genome
KX063900.1	Diplostephium lacunosum voucher ANDES:Vargas 260 chloroplast, complete genome
KX063899.1	Laennecia sophiifolia voucher TEX:Reina 2010-805 chloroplast, complete genome
KX063898.1	Diplostephium antioquense voucher ANDES:Vargas 533 chloroplast, complete genome
KX063897.1	Diplostephium glutinosum voucher ANDES:Vargas 339 chloroplast, complete genome
KX063896.1	Diplostephium eriophorum voucher ANDES:Vargas 505 chloroplast, complete genome
KX063895.1	Diplostephium phylicoides voucher ANDES:Vargas 301 chloroplast, complete genome
KX063894.1	Diplostephium cajamarquillense voucher F:Sagastegui 17024 chloroplast, complete genome
KX063893.1	Diplostephium haenkei voucher HUSA:Vargas 372 chloroplast, complete genome
KX063892.1	Diplostephium ericoides voucher QCA:Vargas 489 chloroplast, complete genome
KX063891.1	Diplostephium violaceum voucher ANDES:Vargas 501 chloroplast, complete genome
KX063890.1	Diplostephium rhomboidale voucher ANDES:Vargas 340 chloroplast, complete genome
KX063889.1	Diplostephium cinereum voucher HUSA:Caceres 1494 chloroplast, complete genome
KX063888.1	Baccharis tricuneata voucher HUSA:Vargas 356 chloroplast, complete genome
KX063887.1	Diplostephium gnidioides voucher HUSA:Vargas 430 chloroplast, complete genome
KX063886.1	Blakiella bartsiifolia voucher TEX:Cuatrecasas 28129 chloroplast, complete genome
KX063885.1	Diplostephium rhododendroides voucher ANDES:Vargas 233 chloroplast, complete genome
KX063884.1	Diplostephium oxapampanum voucher HUSA:Vargas 408 chloroplast, complete genome
KX063883.1	Diplostephium juniperinum voucher QCA:Vargas 480 chloroplast, complete genome
KX063882.1	Diplostephium rupestre voucher ANDES:Vargas 504 chloroplast, complete genome
KX063881.1	Exostigma notobellidiastrum voucher TEX:Tressens 6388 chloroplast, complete genome
KX063880.1	Diplostephium hartwegii voucher QCA:Vargas 456 chloroplast, complete genome
KX063879.1	Lagenophora cuchumatanica voucher TEX:De Jong 694 chloroplast, complete genome
KX063878.1	Diplostephium revolutum voucher ANDES:Vargas 321 chloroplast, complete genome
KX063877.1	Diplostephium gynoxyoides voucher HUSA:Vargas 395 chloroplast, complete genome
KX063876.1	Diplostephium colombianum voucher ANDES:Vargas 299 chloroplast, complete genome
KX063875.1	Diplostephium tenuifolium voucher ANDES:Vargas 520 chloroplast, complete genome
KX063874.1	Diplostephium rhomboidale voucher QCA:Vargas 492 chloroplast, complete genome
KX063873.1	Laestadia muscicola voucher TEX:Paco 31 chloroplast, complete genome
KX063872.1	Diplostephium floribundum voucher ANDES:Vargas 499 chloroplast, complete genome
KX063871.1	Diplostephium sp. CAJ2 voucher HUA:Alzate 3284 chloroplast, complete genome
KX063870.1	Diplostephium callilepis voucher HUSA:Vargas 376 chloroplast, complete genome
KX063869.1	Heterothalamus alienus voucher TEX:Bartlett 20909 chloroplast, complete genome
KX063868.1	Diplostephium lechleri voucher HUSA:Vargas 381 chloroplast, complete genome
KX063867.1	Diplostephium sp. CAJ2 voucher HUSA:Ortiz 815 chloroplast, complete genome
KX063866.1	Diplostephium glandulosum voucher ANDES:Vargas 247 chloroplast, complete genome
KX063865.1	Diplostephium barclayanum voucher QCA:Vargas 477 chloroplast, complete genome
KX063864.1	Baccharis genistelloides voucher HUSA:Vargas 358 chloroplast, complete genome
KX063863.1	Soliva sessilis voucher F:Sagastegui 17106 chloroplast, complete genome
KX063862.1	Diplostephium cinerascens voucher ANDES:Vargas 446 chloroplast, complete genome
KX063861.1	Oritrophium peruvianum voucher ANDES:Vargas 448 chloroplast, complete genome
KX063860.1	Diplostephium jelskii voucher USM<PER_:Cano 14716 chloroplast, complete genome
KX063859.1	Archibaccharis asperifolia voucher TEX:Trujillo 1192 chloroplast, complete genome
KX063858.1	Diplostephium sp. CAJ2 voucher HUSA:Vargas 414 chloroplast, complete genome
KX063857.1	Diplostephium pulchrum voucher HUSA:Vargas 404 chloroplast, complete genome
KX063856.1	Diplostephium alveolatum voucher ANDES:Vargas 205 chloroplast, complete genome
KX814336.2	Corylus chinensis chloroplast, complete genome
KX822767.2	Corylus fargesii chloroplast, complete genome
KX822768.2	Corylus avellana chloroplast, complete genome
KX822769.2	Corylus heterophylla chloroplast, complete genome
KX852427.1	Lagerstroemia intermedia chloroplast, complete genome
KX752081.1	Lysionotus pauciflorus chloroplast, complete genome
KT633951.1	Eriobotrya japonica chloroplast, complete genome
KX774737.1	Primula kwangtungensis chloroplast, complete genome
KY009938.1	Lilium taliense chloroplast, complete genome
KX886357.1	Aethionema arabicum chloroplast, complete genome
KX886356.1	Arabidopsis halleri chloroplast, complete genome
KX886355.1	Arabidopsis lyrata chloroplast, complete genome
KX886354.1	Tarenaya hassleriana chloroplast, complete genome
KX886353.1	Lepidium meyenii chloroplast, complete genome
KX886352.1	Camelina sativa chloroplast, complete genome
KX886351.1	Thlaspi arvense chloroplast, complete genome
KX886350.1	Neotorularia korolkowii chloroplast, complete genome
KX886349.1	Megacarpaea delavayi chloroplast, complete genome
KX886348.1	Solms-laubachia eurycarpa chloroplast, complete genome
KX886347.1	Matthiola incana chloroplast, complete genome
KX371593.1	Megadenia pygmaea chloroplast, complete genome
KY646167.1	Fritillaria cirrhosa chloroplast, complete genome
KY646166.1	Fritillaria ussuriensis chloroplast, complete genome
KY646165.1	Fritillaria thunbergii chloroplast, complete genome
KM014691.1	Iris gatesii voucher T06-52 plastid, complete genome
KY434061.1	Fragaria pentaphylla chloroplast, complete genome
KY511609.1	Acer griseum chloroplast, complete genome
KX641757.1	Primula persimilis chloroplast, complete genome
KY246947.1	Cyclocarya paliurus chloroplast, complete genome
KU985054.1	Prunus yedoensis chloroplast, complete genome
KX290855.1	Passiflora edulis chloroplast, complete genome
KY117235.1	Arracacia xanthorrhiza chloroplast, complete genome
KX636161.1	Rehmannia elata chloroplast, complete genome
KX636160.1	Rehmannia piasezkii chloroplast, complete genome
KX636159.1	Rehmannia solanifolia chloroplast, complete genome
KX636158.1	Rehmannia henryi chloroplast, complete genome
KX636157.1	Rehmannia glutinosa chloroplast, complete genome
KY498535.1	Alyssum desertorum voucher ADES20160707 chloroplast, complete genome
KY038820.1	UNVERIFIED: Phyllostachys edulis chloroplast sequence
KY088271.1	Ostrya trichocarpa chloroplast, complete genome
KY084475.1	Cannabis sativa chloroplast, complete genome
KX639503.1	Ranunculus austro-oreganus chloroplast, complete genome
[truncated: 2,660 more rows]
